1 **Asymmetric outcome of community coalescence of seed and soil microbiota during early**  
2 **seedling growth**

3 **Running title:** Asymmetric coalescence of seed and soil microbiota

4 **Authors:** Aude Rochefort<sup>1</sup>, Marie Simonin<sup>2</sup>, Coralie Marais<sup>2</sup>, Anne-Yvonne Guillerm-  
5 Erckelboudt<sup>1</sup>, Matthieu Barret<sup>2</sup>, Alain Sarniguet<sup>2</sup>✉

6 <sup>1</sup>INRAE, Agrocampus-Ouest, Université de Rennes 1, UMR 1349 IGEPP, Le Rheu, France

7 <sup>2</sup>IRHS-UMR1345, Université d'Angers, INRAE, Institut Agro, SFR 4207 QuaSaV, 49071,  
8 Beaucouzé, France

9 ✉ [alain.sarniguet@inrae.fr](mailto:alain.sarniguet@inrae.fr)

10 **Abstract**

11 Seed microbial community constitutes a primary inoculum for plant microbiota assembly.  
12 Still, the persistence of seed microbiota when seeds encounter soil during plant emergence  
13 and early growth is barely documented. Here, we characterized the interchange event or  
14 coalescence of seed and soil microbiota and how it structured seedling bacterial and fungal  
15 communities. We performed eight contrasted coalescence events to identify drivers  
16 influencing seedling microbiota assembly: four seed lots of two *Brassica napus* genotypes  
17 were sown in two soils of contrasted diversity. We found that seedling root and stem  
18 microbiota were influenced by soil diversity but not by initial seed microbiota composition. A  
19 strong selection on the two-source communities occurred during microbiota assembly, with  
20 only 8-32% of soil taxa and 0.8-1.4% of seed-borne taxa colonizing seedlings. The  
21 recruitment of seedling microbiota came mainly from soil (35-72% of diversity) and not from  
22 seeds (0.3-15%). The outcome of seed and soil microbiota coalescence is therefore strongly  
23 asymmetrical with a dominance of soil taxa. Interestingly, seedling microbiota was primarily

24 composed of initially rare taxa (from seed, soil or unknown origin) and sub-dominant soil  
25 taxa. Our results suggest that plant microbiome engineering success based on native seed or  
26 soil microbiota will rely on rare and sub-dominant taxa in source communities.

27 Keywords: microbiota, coalescence, seed, root, stem, soil, *Brassica napus*

## 28 **Introduction**

29 Plants live in complex associations with a wide variety of microorganisms that can modulate  
30 their fitness (1–3). The plant microbiota is mainly acquired horizontally through different  
31 environmental sources including soil (4), air (5), rainfall (6) and insects (7). However, some  
32 members of the plant microbiota are also acquired vertically through vegetative propagation  
33 (8) or sexual reproduction *via* seeds (9).

34 In spermatophyte, seed-associated microbial community constitutes the primary  
35 inoculum for the next plant generation (10). The seed microbiota can have a crucial role for  
36 crop installation by modulating dormancy (11,12), germination (13,14), seedling  
37 development (15–17) and recruitment of plant symbionts (18). Seed transmission of some  
38 specific plant-beneficial or phytopathogenic microbial strains is well documented (19–23).  
39 However, little knowledge is available on the fraction of the plant microbiota that is acquired  
40 through seeds. Pioneer studies indicate that a fraction of seed microbiota persists during  
41 germination and emergence and actively colonizes seedlings (24–26). Still, most of these  
42 studies have been carried out in gnotobiotic conditions in absence of other environmental  
43 sources, like soil.

44 The encounter between two microbial communities and how they then evolve  
45 together has been called community coalescence (27–29). The outcomes of community  
46 coalescence can vary in a continuum between two categories from symmetric to asymmetric  
47 outcomes (30). In symmetrical outcomes, the initial communities contribute quite equally to  
48 the resultant coalesced community, whereas in asymmetrical outcomes one initial  
49 community becomes dominant if considering the prevalence of the members. In the latter  
50 case, the resident community is generally favored at the expense of the invasive community.

51 This resident advantage can be explained by (i) a higher population size of the resident  
52 community (i.e. mass effects) (31), (ii) prior use of resource and space (i.e. priority effects)  
53 (32) or (iii) local adaptation of the resident community to the reception niche (i.e.  
54 community monopolization effect) (33).

55 To date, seed or soil microbiota have been extensively studied in isolation but their  
56 coalescence, the assembly mechanisms at play remain broadly unexplored and their  
57 coalescence type remains to be characterized. Seed and soil coalescence present a singular  
58 situation if the seedling community is considered as the outcome community. The seed  
59 community is extremely reduced in terms of abundance compared to soil community, but its  
60 members have potentially a 'home advantage' as they have been selected by the plant. We  
61 therefore hypothesized that despite its lower microbial richness and diversity, seed  
62 microbiota being already present and more adapted to the plant environment, would  
63 benefit from priority effects over soil microbiota for the colonization of plant compartments  
64 (18). Nevertheless, adaptation to seed does probably not recover all features for adaptation  
65 to a growing seedling. The initial soil microbial diversity level is probably another key driver  
66 of seedling microbiota and persistence of seed-borne microbial taxa. Indeed, we propose  
67 that a soil of high microbial diversity would induce a weaker colonization of the seed  
68 microbiota on seedlings due to stronger competition and higher functional redundancy in  
69 this soil (34).

70 In the present work, we monitored the outcome of seed and soil communities'  
71 coalescence during early seedling growth. More specifically, we investigated (i) what is the  
72 main source of microbial transmission to seedlings; (ii) does seed microbiota composition  
73 and soil diversity impact the assembly of seedling microbiota; and (iii) does the initial taxon

74 abundance in the source influence its transmission success? To answer these questions, we  
75 selected seed lots of different genotypes of the winter oilseed rape *Brassica napus*, which  
76 harbored contrasting seed microbiota (35). We simulated a total of eight different  
77 coalescence events by sowing the four seed lots in two soils of different microbial diversities.  
78 Bacterial and fungal community structure was characterized by amplicon sequencing of the  
79 source seed and soil communities and of the roots and stems sampled at different seedling  
80 growing stages. This study gained new insights into the soil and plant drivers that influence  
81 the coalescence of soil and seed microbiota during the first steps of seedling microbiota  
82 assembly.

83

## 84 **Materials and Methods**

### 85 *Soil preparation*

86 In 2014, soil was sampled at a depth of 10-30 cm in a 20-year wheat experimental plot (La  
87 Gruche, Pacé, France, 48°08'24.5"N 1°48'01.0"W). Soil was sterilized and recolonized with  
88 two levels of soil microbial diversity according to the experimental procedure described in  
89 Lachaise *et al.* (36). In short, a fraction of the soil sample was ground and sieved at 2 mm.  
90 Three sub-samples (900 g each) were soaked in 8L of sterile water. The resulting soil  
91 suspensions were 1:10 serially diluted in sterile water up to the  $10^{-6}$ . Another fraction (~80  
92 kg) of the soil sample was ground, sieved at 4 mm and mixed with 1/3 washed sand. This soil  
93 was dispatched in 2.5 kg bags and gamma-irradiated (35 kGy, Ionisos, France). Each bag was  
94 inoculated with 320 mL of undiluted or  $10^{-6}$  or soil suspensions, therefore resulting in soil  
95 with high and low microbial diversity, respectively. The soil recolonization was repeated 3  
96 times (A, B, C). The bags were mixed and aerated in sterile conditions twice a week during  
97 the 39 incubation days at 20°C, to homogenize gaseous exchanges and recolonization.  
98 Microbial recolonization dynamics of soil was monitored by sampling 30g of soil at several  
99 times. For bacteria, each sample was serially diluted and plated on 1/10 strength Tryptic Soy  
100 Agar (17 g.L<sup>-1</sup> tryptone, 3 g.L<sup>-1</sup> soybean peptone, 2.5 g.L<sup>-1</sup> glucose, 5 g.L<sup>-1</sup> NaCl, 5 g.L<sup>-1</sup> K<sub>2</sub>HPO<sub>4</sub>  
101 and 15 g.L<sup>-1</sup> agar) supplemented with Nystatin (0.025 g.L<sup>-1</sup>), and the number of colony-  
102 forming units was measured after 3 days of incubation at 27°C. For fungi, following the pour-  
103 plate method, serially diluted samples were mixed with molten Acid Malt Agar (10 g.L<sup>-1</sup> malt  
104 extract, 15 g.L<sup>-1</sup> agar and 0.25 g.L<sup>-1</sup> citric acid) supplemented with streptomycin (0.15 g.L<sup>-1</sup>)  
105 and penicillin (0.075 g.L<sup>-1</sup>) and the number of colony-forming units was measured after 7  
106 days of incubation at 20°C. After 39 days of incubation, a portion of each soil (high and low

107 diversity) in three independent repetitions (A, B, C) was collected and stored at -80°C until  
108 DNA extraction. Organic and mineral composition and pH of these samples were analyzed  
109 (INRAE, Arras, France). Differences between soil composition were considered as significant  
110 with T-test at a p-value <0.1.

### 111 *Sowing and sampling*

112 After 39 days of soil incubation, individual pots were filled with a 5 mm layer of sterile  
113 vermiculite and 80g of soil of high or low microbial diversity. Soils were saturated with tap  
114 water by sub-imbibition one day before sowing, in order to reach approximately 80% of  
115 humidity (retention capacity) on the day of sowing. During the experiment, plants were  
116 watered twice (at 5 and 12 days) with tap water.

117 Seed samples from two genotypes of *Brassica napus* (Boston and Major) collected  
118 during two consecutive years (Y1 and Y2) were selected for this work, resulting in four  
119 contrasted initial seed microbiota used for the coalescence experiment. At d0, seeds of each  
120 genotype and year were individually sown at a depth of 5mm and grown under controlled  
121 conditions (14h day/ 10h night period, 20°C). Seven days (d07) and fourteen days (d14) after  
122 sowing, 10 and 20 plants were sampled per modality (2 genotypes x 2 harvesting years x 2  
123 soils), respectively. Roots were cut from stems and gently soaked 10 seconds in sterile water  
124 to remove residual soil. Otherwise, stems were size-equalized on 2cm from the root basis.  
125 Therefore, the resulting sampled root habitat was composed of the inner root and  
126 rhizoplane and the stem habitat was composed of inner stem and stem surface. The 10 (d07)  
127 or 20 (d14) roots and stems were pooled separately and stored as root and stem  
128 compartments at -80°C until DNA extraction.

### 129 *Microbial DNA sample preparation*

130 Seed samples were prepared for extraction as previously detailed in Rochefort et al., (2019).  
131 Briefly, seeds were soaked in phosphate-buffered saline (PBS, Sigma-Aldrich) supplemented  
132 with Tween® 20 (0.05 % v/v, Sigma-Aldrich) during 2h30 at 4°C. DNA extraction was  
133 performed with the DNeasy PowerSoil HTP 96 Kit (Qiagen) following manufacturers  
134 procedure. Soil, root and stem samples were lyophilized before DNA extraction. Samples  
135 were mixed with 1mm and 3mm beads, and crushed 2 x 30s at 5m/s with FastPrep (MP  
136 Biomedicals). DNA extraction was performed with the DNeasy PowerSoil HTP 96 Kit.

#### 137 *Library construction and sequencing*

138 Amplicon libraries were constructed with the primer sets *gyrB*\_aF64/*gyrB*\_aR553 (24) and  
139 ITS1F/ITS2 (37), following the experimental procedure previously described in Rochefort *et*  
140 *al.* (35). A blank extraction kit control and a PCR-negative control were included in each PCR  
141 plate. Amplicon libraries were mixed with 10% PhiX and sequenced with two MiSeq reagent  
142 kit v3 600 cycles.

#### 143 *Sequence processing*

144 Primer sequences were removed with cutadapt version 1.8 (38). Fastq files were processed  
145 with DADA2 version 1.6.0 (39), using the following parameters: truncLen=c(190, 200),  
146 maxN=0, maxEE=c(1,1), truncQ=5 for *gyrB* reads. ITS1 reads were processed with the same  
147 parameters, except that reads were not trimmed to a fixed length and that truncQ was set to  
148 2. Chimeric sequences were identified and removed with the removeBimeraDenovo function  
149 of DADA2. Taxonomic affiliations of amplicon sequence variants (ASV) were performed with  
150 a naive Bayesian classifier (40) implemented in DADA2. ASVs derived from *gyrB* reads were  
151 classified with an in-house *gyrB* database (train\_set\_gyrB\_v4.fa.gz) available upon request.  
152 ASVs derived from ITS1 reads were classified with the UNITE v7.1 fungal database (41).



153 *Microbial community analyses*

154 Analyses of diversity were conducted with the R package Phyloseq version 1.26.0 (42). Since  
155 the primer set *gyrB*\_aF64/*gyrB*\_aR553 can sometimes co-amplify *parE*, a paralog of *gyrB*, the  
156 *gyrB* taxonomic training data also contained *parE* sequences. Hence, ASV affiliated to *parE* or  
157 unclassified at the phylum-level were removed. Sequences were aligned with DECIPHER  
158 2.14.0 (43) and neighbor-joining phylogenetic trees were constructed with Phangorn 2.5.5  
159 (44). Identification of sequence contaminant was assessed with decontam version 1.4 (45)  
160 using the “prevalence” method at a threshold of 0.1. Fungal ASVs unassigned at the phylum  
161 level were removed. For the ITS1 dataset, we created a hybrid-gene phylogenetic tree (i.e.  
162 ghost tree) (46) based the 18S rRNA gene sequence database (Silva 132) and ITS database  
163 (UNITE v8) in order to perform phylogenetic analyses.

164 Data were normalized based on sequencing depth. For soil analyses, data were  
165 rarefied at 30 000 and 25 000 reads per sample for *gyrB* and ITS1, respectively. For plant  
166 (root and stem) analyses, data were rarefied at 1 000 reads per sample for *gyrB* and ITS1  
167 (**Fig. S1**), a validated choice to keep an optimal number of reliable samples. Faith’s  
168 phylogenetic diversity was calculated on *gyrB* and ITS1 datasets with the R package picante  
169 version 1.8 (47). Differences in alpha-diversity estimators were assessed with Analysis of  
170 Variance. Differences were considered as significant at a p-value < 0.05.

171 Changes in microbial community composition were assessed on  $\log_{10}+1$  transformed  
172 values with Bray-Curtis (BC) index. Principal coordinate analysis (PCoA) was used for  
173 ordination of BC index. Homogeneity of group dispersions was assessed with betadisper  
174 function of vegan 2.5.3 (48). Difference in dispersion between groups was assessed with a  
175 Wilcoxon non-parametric test. To quantify the relative contribution of seed microbiota, soil

176 diversity, development stage and habitat in microbial community profiles, permutational  
177 multivariate analysis of variance (PERMANOVA) (49) was performed with the function  
178 `adonis2` of the R package `vegan` 2.5.3 (48). The relative abundance of ASVs belonging to  
179 ammonia-oxidizing bacteria (AOB) and nitric-oxidizing bacteria (NOB) according to their  
180 taxonomic classification were investigated in soils of high and low microbial diversities.  
181 These include *Nitrosospira* sp. and *Nitrosovibrio* sp. for AOB and *Nitrobacter* sp. and  
182 *Nitrospira* sp. for NOB (50,51). Differences in relative abundance of AOB and NOB were  
183 considered as significant with T-test at a p-value <0.1.

#### 184 *Transmission analyses*

185 A prevalence matrix of common ASVs between seeds, soils, roots and stems was constructed  
186 on non-rarefied data to have the most exhaustive presence-absence analysis of all taxa.  
187 Owing to the microbial variability between individual seeds, an ASV was recorded as present  
188 if detected in at least one of the 3 seed sample repetitions. Visualization of bacterial and  
189 fungal ASVs shared between biological habitats or specific to one was assessed with the R  
190 package `UpSetR` 1.4.0 (52).

191 The datasets supporting the conclusions of this article are available in the European  
192 Nucleotide Archive under the accession number PRJEB41004.

193

194 **Results**

195 *Selected seed lots have distinct microbial communities*

196 Harvesting year and plant genotypes are significant drivers of the diversity structure of the *B.*  
197 *napus* seed microbiota (35). Two *B. napus* genotypes (Boston and Major) collected during  
198 two harvest years (Y1 and Y2) were selected for this work. The most prevalent seed-borne  
199 bacterial ASVs were affiliated to *Sphingomonas* and *Frigoribacterium* genera (**Fig. S2A**).  
200 Fungal communities were dominated by ASVs affiliated to *Cladosporium* and *Alternaria*  
201 genera (**Fig. S2B**).

202 Estimated bacterial richness (Chao1) was on average at least two times higher in Y2  
203 (250 ASVs) than in Y1 (100 ASVs) for both genotypes, and phylogenetic diversity (Faith's PD)  
204 was also significantly ( $p < 0.05$ ) higher in Y2 (**Fig. 1A**).

205 While estimated fungal richness was also higher in Y2 (~50 ASVs) than in Y1 (~35  
206 ASVs), phylogenetic diversity was higher in Y1 (**Fig. 1B**). According to distance from centroid,  
207 variation in bacterial and fungal community composition (BC index) was significantly lower ( $p$   
208  $< 0.05$ ) in Y2 in comparison to Y1 (**Fig. 1C**). Structure of microbial communities was  
209 significantly ( $p < .001$ ) impacted by harvesting year with 24% and 62% of variance explained  
210 by this factor for bacteria and fungi, respectively (**Fig. 1D**). Moreover, seed genotype was  
211 also significantly ( $p < 0.001$ , 13% of variance) impacting bacterial community composition  
212 but not fungal community composition (**Fig. 1D**). In brief, the structure of microbial  
213 communities was different between the seed lots selected for this study and harvest year  
214 was the most important driver of these changes.

215

216 *Production of soils with contrasting levels of diversity*

217 To obtain two soils with contrasted levels of microbial diversity, gamma-irradiated soil was  
218 inoculated with undiluted and diluted soil suspensions (Materials & Methods). After 39 days  
219 of incubation, a plateau of  $10^9$  bacterial CFU and  $10^5$  fungal CFU per gram of soil was reached  
220 for each soil (**Fig. S3**). The acidity level of low-diversity soils significantly ( $p = 0.003$ ) increased  
221 by 0.65 pH unit compared to high-diversity soil. In addition the amount of nitric nitrogen was  
222 twice as large in high-diversity soils ( $p < 0.001$ ), whereas ammoniacal nitrogen significantly ( $p$   
223  $< 0.001$ ) decreased (**Table 1**). Relative abundance of AOB was significantly ( $p < 0.1$ ) higher in  
224 the soil of high diversity in comparison with the soil of low diversity. Moreover, no NOB was  
225 detected in the soil of low diversity while the soil of high diversity was composed on average  
226 of 0.25% NOB.

227 The most prevalent soil-borne bacterial ASVs were affiliated to *Massilia*, *Nitrosospira*  
228 and *Sphingomonas* (**Fig. S2A**). The most prevalent soil-borne fungal ASVs were affiliated to  
229 *Mortierella*, *Trichoderma* and *Exophiala* (**Fig. S2B**).

230 According to alpha-diversity indexes (Chao1 and Faith's index), high-diversity soils  
231 presented a higher ( $p < 0.05$ ) bacterial richness (~800 ASVs) and phylogenetic diversity  
232 compared to low-diversity soils (~500 ASVs) (**Fig. 1A**). With regard to fungal communities,  
233 only phylogenetic diversity was greater in high-diversity soils (**Fig. 1B**). Variation in microbial  
234 community composition was more important for low-diversity soils compared to high-  
235 diversity soils (**Fig. 1C**). The initial level of dilution employed explained 40% and 39% of the  
236 variance observed in bacterial and fungal communities, respectively (**Fig. 1D**). Hence, the  
237 dilution approach employed in this work resulted in two soils with contrasted levels of  
238 phylogenetic diversity and distinct community structure.

239 *Initial level of soil diversity impacted the diversity and structure of the plant microbiota*

240 The outcome of community coalescence between seed and soil microbiota was investigated  
241 on two plant compartments (stem and root) collected at two distinct plant developmental  
242 stages (d07 and d14). On the seedling roots and stems, the most prevalent bacterial and  
243 fungal ASVs presented abundance patterns clearly influenced by initial soil diversity (e.g.  
244 *Devosia* or *Fusicolla aquaeductum*, **Fig. S2**). Diverse bacterial (e.g. *Afipia*, *Ensifer*,  
245 *Fictibacillus*, *Nocardioides*) and fungal genera (e.g. *Peziza*, *Fusicolla*, *Metarhizium*) were  
246 dominant on seedling roots. The stems were dominated by bacterial ASVs affiliated to  
247 *Bacillus*, *Nocardioides*, *Devosia* and *Fictibacillus*, while the most prevalent fungal genera  
248 were *Fusarium*, *Fusicolla* and *Acremonium* (**Fig. S2**).

249 Seed genotypes and harvest years did neither impact estimated richness nor  
250 phylogenetic diversity in stem and root (**Fig. 2**).

251 In contrast, the initial level of soil diversity significantly ( $p < 0.05$ ) influenced microbial  
252 richness (**Fig. 2A** and **2C**) and phylogenetic diversity (**Fig. 2B** and **2D**) in stems at d07 and d14,  
253 with a higher richness and diversity in stems collected from high-diversity soils. No  
254 significant change in bacterial richness and phylogenetic diversity was detected in roots  
255 between the two soils (**Fig. 2A** and **2B**) while fungal richness and phylogenetic diversity were  
256 almost two times higher in roots from soil of high diversity at each development stage (**Fig.**  
257 **2C** and **2D**).

258 Moreover, there was a little but significant increase in bacterial richness and  
259 phylogenetic diversity in stems at stage d14 compared to stage d07. No differences were  
260 observed on fungal diversity across stages (**Fig. 2**).

261           Composition of the plant microbiota was not influenced by the seed genotype and  
262           the harvesting year (**Fig. 2E-H** and **Table 2**). In contrast, the initial soil diversity significantly  
263           ( $p < 0.001$ ) contributed to the variance observed in stem (14.6%) and root (36.8%) bacterial  
264           communities (**Fig. 2I-J**) as well as the variance in stem (24.1%) and root (22.1%) fungal  
265           communities (**Fig. 2K-L** and **Table 2**). Stem- and root-associated microbial community  
266           compositions were also significantly impacted by the plant developmental stage (**Table 2**).

### 267           *Relative contribution of seed-borne and soil taxa to seedling microbiota*

268           To describe the outcome of community coalescence between seed and soil microbiota  
269           during seedling growth, we characterized the proportion of bacterial and fungal ASVs from  
270           seed, soil or unknown origin that composed the stem and root seedling microbiota. A total  
271           of 39 bacterial ASVs and 16 fungal ASVs were shared between seeds, roots and stems (**Fig.**  
272           **3**). Among these ASVs, 16 bacterial and 4 fungal ASVs were also found in soil samples.

273           Between 35 and 72% of seedling-associated bacterial ASVs were detected in the soil,  
274           while 20 to 45% of seedling fungal ASVs came from the soil (**Fig. 3**). These soil-derived ASVs  
275           represented between 40 and 98% of the total seedling microbiota. On the contrary, few  
276           seedling-associated ASVs were detected in the seed (0.3-15%) representing less than 1% of  
277           microbial relative abundance in roots and stems (**Fig. 3**). Lastly, a fraction of the seedling  
278           microbiota was of undetermined origin as undetected in the initial seed and soil pools. ASVs  
279           of undetermined origin either may correspond to unsampled taxa in soil or seed  
280           compartments (i.e. rare taxa) or may derive from other environmental sources. The  
281           proportion of bacterial ASVs of undetermined origin was higher for plants grown in the high-  
282           diversity soil (approximately 45-65% of community membership and composition) than in  
283           the low-diversity soil (20-30%) (**Fig. 3** and **Fig. S4A**). This result suggests that seedlings are

284 primarily colonized by rare soil taxa that were initially undetected. In contrast, fungal ASVs  
285 not detected in soil and seeds represented approximately 40-60% of community  
286 membership in plants but their impacts on community (*i.e.* their relative abundance) was  
287 quite low with less than 20% regardless of the soil diversity (**Fig. 3** and **Fig. S4B**).

288 Contrasting microbial taxonomic composition was observed between the initial soil  
289 and seed pools. Concerning bacteria, Enterobacterales and Sphingomonadales were more  
290 abundant in seeds, while Burkholderiales were more abundant in soils (**Fig. 4A**). Changes in  
291 bacterial order relative abundance were also detected between stem and root, especially at  
292 d07 where Bacillales dominated the bacterial fraction of the stem microbiota (**Fig. 4A**). The  
293 taxonomic composition of the fungal fraction of the seed and soil microbiota was highly  
294 contrasted at the order level. Seeds were mainly inhabited by Pleosporales, Capnodiales and  
295 Tremellales, when soils were principally constituted of Mortierellales and Hypocreales (**Fig.**  
296 **4B**). This latter order was however more prevalent in low-diversity soils in comparison to  
297 high-diversity soils (**Fig. 4B**). As in soil, Burkholderiales remained the dominant order in roots  
298 but were in part outcompeted by an increasing proportion of Rhizobiales. Xanthomonadales  
299 were reduced in roots especially in low-diversity soil and more drastically after 14 days.  
300 Bacillales were the transitory most dominant order at 7 days in stems before to regress at 14  
301 days. On the opposite Pseudomonadales and Rhizobiales were transitory limited in stems  
302 especially in low-diversity soil before to increase at 14 days (**Fig. 4A**). For fungi, Hypocreales  
303 were highly prevalent in seedlings when Mortierellales were more or less prevalent at 7 days  
304 in roots and stems, then disappeared in roots and were not represented in stems at 14 days  
305 (**Fig. 4B**). These pools represented only a small proportion of transmitted ASVs from seed to  
306 seedling compared to the pools originating from soil (**Fig. 3**). Mainly bacterial ASVs belonging

307 to Bacillales, Burkholderiales and Pseudomonadales and many fungal ASVs belonging to  
308 Hypocreales were transmitted from soil to seedlings.

### 309 *Seedling transmission success of seed-borne and soil microbiota*

310 The contrasted seed lots and soils employed in the experimental design enabled the  
311 investigation in the influence of the initial diversity of the colonizing pools on the  
312 transmission success to the seedling (**Fig. 5**).

313 For bacteria and fungi, we found no clear relationships between the level of diversity  
314 of the initial pool (seed or soil) and the percentage of ASVs transmission in seedlings (**Fig. 5**).  
315 Soil microbiota always presented the highest rates of ASVs transmission to seedlings with 10  
316 to 30% of the initial ASV pool. Overall, the transmission of soil-borne microbiota to seedlings  
317 was higher for the bacterial community (113-180 ASVs) than for the fungal community (3-18  
318 ASVs, **Fig. 5A, 5B**). For bacteria, transmission to seedlings was higher in low-diversity soil  
319 ( $32\% \pm 0.84$ ) compared to high-diversity soil ( $15.6\% \pm 1.49$ , **Fig. 5A**). For fungi, the opposite  
320 pattern was observed with a higher percentage of ASVs transmitted to seedlings from high-  
321 diversity soils ( $19.8\% \pm 3.24$ ) compared to low-diversity soil ( $8.5\% \pm 1.41$ , **Fig. 5B**). A low  
322 percentage of ASVs transmission from seeds to seedlings was observed for bacteria ( $0.8\% \pm$   
323  $0.93$ ) and fungi ( $1.45\% \pm 1.44$ ), with no clear influence of the genotype and harvest year (**Fig.**  
324 **5**). Finally, overall ASV transmission to seedlings was similar on roots and stems, except for  
325 the fungal pool of the high soil diversity where transmission rate in roots was higher ( $22.1\%$   
326  $\pm 3.18$ ) than transmission rate in stems ( $17.7\% \pm 1.2$ , **Fig. 5**).

### 327 *Emergence of rare and sub-dominant taxa in seedlings*

328 We next examined the influence of the initial ASV relative abundance on its seedling  
329 transmission success and resulting abundance in roots and stems at d14. ASVs were grouped



330 in three arbitrary abundance classes: rare (average relative abundance <0.01%), sub-  
331 dominant (between 0.01 and 1%) and dominant (>1%). An interesting finding was that  
332 dominant ASVs in the source pool (seed or soil) almost never became dominant in roots and  
333 stems (below 1:1 line) or were not even transmitted to seedlings (**Fig. 6**). The majority of  
334 transmitted seed-borne bacterial ASVs were initially rare taxa, with nine out of 11 ASVs in roots  
335 and 11 out of 16 ASVs in stems (**Fig. 6A, 6C**). Only one dominant seed ASV (out of 65 in the  
336 initial pool) was found to be transmitted to roots and stems (*Afipia*). One sub-dominant ASV  
337 was successfully transmitted to both roots and stems (*Blastomonas*) and three sub-dominant  
338 ASVs to stems solely (*Pseudomonas lurida*, *Cutibacterium acnes*, *Hyphomicrobium*) (**Table**  
339 **S1**). It should be noted that none of these dominant and sub-dominant transmitted seed-  
340 borne bacterial ASVs became dominant in seedlings (relative abundance <0.3%).

341 The most abundant root bacterial ASVs (>1%) originated from soil-borne ASVs  
342 classified as sub-dominant ASVs (n=26 ASVs) and dominant ASVs (5 ASVs) (**Fig. 6B, 6D**). For  
343 the stems, most of the abundant ASVs originated from sub-dominant soil ASVs (n=24), a few  
344 dominant ASVs (n=6) and one rare ASV. When considering the entire seedling bacterial  
345 microbiota and not only the most abundant taxa, we found that 95% of the dominant soil  
346 ASVs, 40% of the sub-dominant ASVs and 28% of the rare ASVs were transmitted to roots.  
347 For the stems, 86% of dominant ASVs, 40% of sub-dominant ASVs and 29% of rare ASVs  
348 were transmitted.

349 For the fungal community, four seed-borne ASVs were transmitted to both roots and  
350 stems, composed of two dominant ASVs (*Alternaria infectoria*, *Cladosporium delicatulum*),  
351 one sub-dominant (*Alternaria sp.*) and one rare (*Gibberella avenacea*). In addition to these  
352 four ASVs, three additional dominant ASVs, all affiliated to *A. infectoria*, were transmitted to

353 the stems (**Table S2**). For soil-borne fungal ASVs, the most transmitted taxa to roots were  
354 sub-dominant ASVs (19 ASVs, 12% of initial pool) with a few dominant taxa (9 ASVs, 53% of  
355 initial pool) and seven rare ASVs (12% of initial pool) (**Fig. 6E, 6F**). Similarly, soil-borne ASVs  
356 transmitted to stems were predominantly sub-dominant ASVs (15 ASVs, 10% of initial pool)  
357 along with seven dominant ASVs (41% of initial pool) and six rare ASVs (11% of initial pool)  
358 (**Fig. 6G, 6H**). It should be noted that some of these soil-borne fungal ASVs present  
359 extremely high relative abundance in seedlings (>20% relative abundance) compared to  
360 seed-borne ASVs (<2% relative abundance).

361 Altogether, these results indicate that seed-borne taxa transmitted to seedlings are  
362 predominantly rare taxa, while transmitted soil-borne taxa are primarily sub-dominant and  
363 dominant taxa. Moreover, this analysis shows that the transmission rates of fungi is two to  
364 four times lower than bacteria for all ASV abundance classes (dominant: 41-53% vs 86-95%;  
365 sub-dominant: 10-12% vs 40%; rare: 11-12% vs 28-29%).

366

367 **Discussion**

368 *Asymmetric outcome of seed and soil community coalescence in favor of soil microbiota*

369 Soil microbiota had a great influence on the plant microbiota composition since 70% and  
370 30% of soil-borne bacterial and fungal taxa were detected in seedlings, respectively. In  
371 contrast, transmission of seed-borne microorganisms to roots and stems of *B. napus* was  
372 lower than soil with on average 2% of bacterial ASVs and 12% of fungal ASVs detected in  
373 seedlings. The remaining seedling-associated ASVs were not identified in both seed and soil  
374 habitats. It is highly plausible that most of these taxa were soil-borne and were initially not  
375 sampled due to the high heterogeneity of soil spatial structure (28). Indeed, there were on  
376 average many more bacterial ASVs of undetermined origin in the seedlings growing in the  
377 soil of high diversity (> 50%) than in those from a soil of low diversity (< 30%). These data  
378 suggest that a large part of these ASVs come from the soil but that they were not sampled in  
379 high-diversity soils. Overall, these results highlighted an asymmetric outcome of the  
380 coalescence between the soil and the seed microbiota (30), where the soil microbiota take  
381 precedence over the seed microbiota.

382 This asymmetric coalescence could be due the high population size of soil-borne taxa  
383 in comparison to seed-borne microbial population, a process known as mass-effect (31).  
384 Although seed microbial taxa can be considered as plant residents that are adapted to  
385 available niches (53), the successful invasion of root and stem by soil-borne taxa is  
386 undoubtedly facilitated by their population sizes. Alternatively, the dominance of soil  
387 associated microbial communities in seedlings could be explained by the higher amount of  
388 phylogenetic diversity in soil in comparison to seeds. Higher phylogenetic diversity could  
389 indeed increase the functional capabilities of soil associated microbial communities and then

390 limit niche overlap between microbial entities (54). The level of diversity of the initial seed  
391 and soil pools were however not directly correlated to the number of seedling transmitted  
392 ASVs (**Fig. 5**). In other words, the diversity of the regional species pool (i.e. soils and seeds)  
393 were not a good predictor of the diversity of local communities (i.e. seedlings).

394 Weak transmission of seed-borne microorganisms to the rhizosphere has been  
395 previously reported in Asteraceae (55), Cucurbitaceae (56,57) and Poaceae (25,58). Survival  
396 on barley roots of seed-borne bacteria occurred in the non-growing part of the root system  
397 but not in emerging roots that are colonized principally by soil-borne bacteria (58). While we  
398 did not investigate the fate of seed-borne microorganisms in different parts of the root  
399 system of *B. napus*, the same proportion of seed-borne taxa were detected within stems or  
400 roots. Hence, the weak transmission of seed-borne taxa to seedlings was not a consequence  
401 of microhabitat heterogeneity.

402 *Seedling microbiota assembly is driven by the level of soil diversity but not the structure of*  
403 *the seed microbiota*

404 The initial level of soil diversity was the key driver in the assembly of the stem and root  
405 microbiota. Indeed, stem microbial diversity and root fungal diversity were lower in the low-  
406 diversity soils compared to high-diversity soils (**Fig. 2**). Moreover, soil diversity explained  
407 between 15% to 37% of variance in microbial community composition in stem and root (**Fig.**  
408 **2**). The impact of soil diversity on plant microbiota composition increased over time in roots  
409 and stems therefore confirming soil resident time and plant age in root microbiota dynamics  
410 (59,60).

411 The soil recolonization approach employed in this work did result in two soils with  
412 contrasted levels of bacterial and fungal diversity. This modification of soil microbial diversity

413 also impacts the functional diversity and ultimately the soil physicochemical parameters.  
414 Changes in  $\text{NH}_4^+$  and  $\text{NO}_3^-$  concentrations and pH between low and high-diversity soils were  
415 indeed monitored. A similar drastic switch in the net balance between mineral nitrogen  
416 forms, from dominant nitrate forms in the high diversity soil to an altered N-cycle with  
417 dominant ammonium forms in the low diversity soil is reported in another soil dilution  
418 experiment (61). A lower  $\text{NO}_3^-$  amount is consistent with a reduced abundance of bacterial  
419 and archaeal ammonia oxidizers. A higher  $\text{NO}_3^-$  amount is linked with a decrease in the  
420 abundance of denitrifiers that can reduce  $\text{NO}_3^-$  into  $\text{N}_2$ . Nitrification process is associated  
421 with pH reduction prior to  $\text{NO}_2^-$  accumulation period, with a potential decrease of 0.75 pH  
422 unit (62). Hence, the impact of soil diversity on seedling microbiota structure could not be  
423 solely due to the level of microbial diversity but to local changes of physicochemical  
424 parameters.

425         Contrary to what has been observed in the soil, we did not detect any significant  
426 impact of the initial seed microbiota composition on the overall structure of the stem and  
427 root microbiota. This observation reflected not only a low transmission of seed-borne taxa to  
428 roots and stems of *B. napus* but also a weak, if not an absence, of historical contingency.  
429 Historical contingency is mediated by priority effects that correspond to the impact of  
430 species on one another depending on its order of arrival within the local community (32).  
431 Importance of historical contingency in assembly of the plant microbiota was recently  
432 highlighted in wheat, where the identity of seed-transmitted fungal taxa can modify  
433 colonization of roots by dark septate endophytes, three weeks following germination (18).  
434 While we cannot conclude there is an absence of priority effects between microbial species  
435 within the root and stem microbial communities of *B. napus*, historical contingency is not  
436 promoted during seedling community assembly.

437 *Seedling microbiota is primarily composed of initially rare and sub-dominant taxa in source*  
438 *communities*

439 The initial abundance of microbial taxa in the regional species pool was not positively  
440 correlated to their seedling transmission. This was particularly marked for bacterial ASV  
441 where rare seed-borne taxa and sub-dominant soil-borne taxa were mostly transmitted to  
442 the seedling (**Fig. 6, Fig. S5**). An increase in the abundance of rare taxa in seedlings could be  
443 explained by several attributes including more favorable environmental conditions for their  
444 growth and awakening from dormancy (63). Many seed-borne bacteria enter a viable but  
445 non-culturable (VBNC) state (64–66). Nutrient-rich environment, such as the spermosphere  
446 (67), can elicit the resuscitation of VBNC cells (68). In any case, the rare taxa that are  
447 selected on seedlings must carry specific genetic determinants that are responsible for their  
448 higher fitness that deserve to be investigated further. The emergence of rare taxa seems to  
449 be a shared coalescence outcome between different ecosystems, *i.e.* for the mixing of  
450 freshwater and marine microbiome (29), the unequal mixing of two soils with different  
451 physicochemical and microbial compositions (69) or the mixing of soils for the outcome of  
452 rhizobial communities on rooibos nodules (70). Rare taxa becoming dominant can provide  
453 essential or new functions in nutrient cycling or plant growth, which replace or compensate  
454 for the function deficiency of abundant species (71).

455 Interestingly, dominant taxa in the source pool (seed or soil) almost never became  
456 dominant in roots and stems. None of the dominant seed taxa (e.g. *P. agglomerans*) is  
457 transmitted maybe because these taxa are well adapted to ripe seed and low osmotic seed  
458 environment and not to growing seedling in competition with soil microbiota. Conversely,  
459 the better transmission of dominant and sub-dominant soil-borne taxa likely combines soil

460 microbiota mass effect and a plant selective process among soil bacteria that are more  
461 adapted to root and stem habitats.

462

### 463 *Conclusion*

464 In conclusion, we highlighted that the outcome of seed and soil microbiota  
465 coalescence was strongly asymmetrical with a clear dominance of soil microbiota. The level  
466 of soil diversity was an important driver of the structure of the seedling microbiota. Our  
467 approach enabled us to quantify the relative contribution of seed-borne and soil-borne taxa  
468 to seedling microbiota assembly and provided an estimation of transmission rates of each  
469 source microbiota. Out of all soil taxa detected, only 8 to 32% were able to colonize  
470 seedlings, while the proportion was of 0.8 to 1.4% for seed-borne taxa, which indicates a  
471 strong selection during seedling microbiota assembly. We demonstrate a high transmission  
472 of rare seed-borne and sub-dominant soil-borne taxa to seedlings, which is also a key feature  
473 of this coalescence (**Fig. S5**). These results provide an important foundation for the  
474 development of plant microbiome engineering through the modification of native seed or  
475 soil microbiota. Particularly, we encourage future work using natural or synthetic  
476 communities to integrate rare microbial taxa, as we showed that focusing only on dominant  
477 taxa in the source-communities is not informative to understand future seedling microbiota  
478 composition.

479 The community coalescence framework just started to emerge in the field of  
480 microbial ecology and we show here that this approach accelerates discoveries related to  
481 plant microbiota assembly and microbiome engineering. In this dynamic, further studies are  
482 needed to understand the ecological processes involved in this coalescence between seed

483 and soil and how direct inoculation of microorganisms or modification of environmental  
484 conditions might alter its outcome.

485

486 **Acknowledgements:** We thank Muriel Bahut from the ANAN platform (SFR QuaSav) for  
487 amplicon sequencing and Laurent Philippot for discussion. This project named RhizoSeed  
488 was funded by INRAE (Metaomics and Ecosystems Metaprogram, Plant Health division) and  
489 Région Bretagne. We want to apologize to authors whose relevant work was not included in  
490 this article due to space constraints

491

492 **Competing Interests:** Authors declare there are no any conflicts of interests in relation to  
493 the work described.

494 **Code and data availability:** R code and files for all microbiota analyses, statistics and figure  
495 generation are available on GitHub ([https://github.com/arocheft/Seed\\_Soil\\_Coalescence](https://github.com/arocheft/Seed_Soil_Coalescence)).

496

497 **References:**

- 498 1. Panke-Buisse K, Poole AC, Goodrich JK, Ley RE, Kao-Kniffin J. Selection on soil microbiomes  
499 reveals reproducible impacts on plant function. *The ISME Journal*. 2015 Apr;9(4):980–9.
- 500 2. Herrera Paredes S, Gao T, Law TF, Finkel OM, Mucyn T, Teixeira PJPL, et al. Design of  
501 synthetic bacterial communities for predictable plant phenotypes. Kemen E, editor. *PLOS*  
502 *Biology*. 2018 Feb 20;16(2):e2003962.



- 503 3. Kwak M-J, Kong HG, Choi K, Kwon S-K, Song JY, Lee J, et al. Rhizosphere microbiome  
504 structure alters to enable wilt resistance in tomato. *Nature Biotechnology*. 2018  
505 Nov;36(11):1100–9.
- 506 4. Lundberg DS, Lebeis SL, Paredes SH, Yourstone S, Gehring J, Malfatti S, et al. Defining the  
507 core *Arabidopsis thaliana* root microbiome. *Nature*. 2012 Aug;488(7409):86–90.
- 508 5. Abdelfattah A, Sanzani SM, Wisniewski M, Berg G, Cacciola SO, Schena L. Revealing Cues for  
509 Fungal Interplay in the Plant–Air Interface in Vineyards. *Front Plant Sci* [Internet]. 2019 Jul 25  
510 [cited 2020 May 3];10. Available from:  
511 <https://www.ncbi.nlm.nih.gov/pmc/articles/PMC6670289/>
- 512 6. Morris CE, Kinkel LL. Fifty years of phyllosphere microbiology: significant contributions to  
513 research in related fields. In: *Phyllosphere microbiology* [Internet]. St. Paul, Minn: APS Press;  
514 2002 [cited 2020 Sep 23]. p. 365–75. Available from: <https://ci.nii.ac.jp/naid/10019340794/>
- 515 7. Flury P, Vesga P, Dominguez-Ferreras A, Tinguely C, Ullrich CI, Kleespies RG, et al. Persistence  
516 of root-colonizing *Pseudomonas protegens* in herbivorous insects throughout different  
517 developmental stages and dispersal to new host plants. *ISME J*. 2019 Apr;13(4):860–72.
- 518 8. Vannier N, Mony C, Bittebiere A-K, Michon-Coudouel S, Biget M, Vandenkoornhuysen P. A  
519 microorganisms' journey between plant generations. *Microbiome*. 2018 Dec;6(1):79.
- 520 9. Shade A, Jacques M-A, Barret M. Ecological patterns of seed microbiome diversity,  
521 transmission, and assembly. *Current Opinion in Microbiology*. 2017 Jun;37:15–22.
- 522 10. Newcombe G, Harding A, Ridout M, Busby PE. A Hypothetical Bottleneck in the Plant  
523 Microbiome. *Front Microbiol* [Internet]. 2018 [cited 2019 Apr 24];9. Available from:  
524 <https://www.frontiersin.org/articles/10.3389/fmicb.2018.01645/full>

- 525 11. McPhail KL, Armstrong DJ, Azevedo MD, Banowetz GM, Mills DI. 4-  
526 Formylaminoxyvinylglycine, an Herbicidal Germination-Arrest Factor from *Pseudomonas*  
527 Rhizosphere Bacteria. *J Nat Prod.* 2010 Nov 29;73(11):1853–7.
- 528 12. Chahtane H, Nogueira Füller T, Allard P-M, Marcourt L, Ferreira Queiroz E, Shanmugabalaji V,  
529 et al. The plant pathogen *Pseudomonas aeruginosa* triggers a DELLA-dependent seed  
530 germination arrest in *Arabidopsis*. Hardtke CS, Kliebenstein DJ, editors. *eLife.* 2018 Aug  
531 28;7:e37082.
- 532 13. Rodrigues Pereira AS, Houwen PJW, Deurenberg-Vos HWJ, Pey EBF. Cytokinins and the  
533 bacterial symbiosis of *Ardisia* species. *Zeitschrift für Pflanzenphysiologie.* 1972 Nov  
534 1;68(2):170–7.
- 535 14. Goggin DE, Emery RJN, Kurepin LV, Powles SB. A potential role for endogenous microflora in  
536 dormancy release, cytokinin metabolism and the response to fluridone in *Lolium rigidum*  
537 seeds. *Ann Bot.* 2015 Feb;115(2):293–301.
- 538 15. Verma SK, Kingsley K, Irizarry I, Bergen M, Kharwar RN, White JF. Seed-vectored endophytic  
539 bacteria modulate development of rice seedlings. *Journal of Applied Microbiology.*  
540 2017;122(6):1680–91.
- 541 16. Walitang DI, Kim C-G, Kim K, Kang Y, Kim YK, Sa T. The influence of host genotype and salt  
542 stress on the seed endophytic community of salt-sensitive and salt-tolerant rice cultivars.  
543 *BMC Plant Biology.* 2018 Mar 27;18(1):51.
- 544 17. Khalaf E, Raizada M. Bacterial Seed Endophytes of Domesticated Cucurbits Antagonize  
545 Fungal and Oomycete Pathogens Including Powdery Mildew. *Front Microbiol.* 2018;

- 546 18. Ridout ME, Schroeder KL, Hunter SS, Styer J, Newcombe G. Priority effects of wheat seed  
547 endophytes on a rhizosphere symbiosis. *Symbiosis*. 2019 May 1;78(1):19–31.
- 548 19. Darrasse A, Darsonval A, Boureau T, Brisset M-N, Durand K, Jacques M-A. Transmission of  
549 Plant-Pathogenic Bacteria by Nonhost Seeds without Induction of an Associated Defense  
550 Reaction at Emergence. *Appl Environ Microbiol*. 2010 Oct 15;76(20):6787–96.
- 551 20. Dutta B, Scherm H, Gitaitis RD, Walcott RR. *Acidovorax citrulli* Seed Inoculum Load Affects  
552 Seedling Transmission and Spread of Bacterial Fruit Blotch of Watermelon Under  
553 Greenhouse Conditions. *Plant Disease*. 2012 May;96(5):705–11.
- 554 21. Bertolini E, Teresani GR, Loiseau M, Tanaka F a. O, Barbé S, Martínez C, et al. Transmission of  
555 ‘Candidatus Liberibacter solanacearum’ in carrot seeds. *Plant Pathology*. 2015;64(2):276–85.
- 556 22. Vázquez-de-Aldana BR, García-Ciudad A, García-Criado B, Vicente-Tavera S, Zabalgogea  
557 I. Fungal Endophyte (*Epichloë festucae*) Alters the Nutrient Content of *Festuca rubra*  
558 Regardless of Water Availability. *PLOS ONE*. 2013 Dec 18;8(12):e84539.
- 559 23. Mitter B, Pfaffenbichler N, Flavell R, Compant S, Antonielli L, Petric A, et al. A New Approach  
560 to Modify Plant Microbiomes and Traits by Introducing Beneficial Bacteria at Flowering into  
561 Progeny Seeds. *Front Microbiol* [Internet]. 2017 Jan 23 [cited 2020 May 3];8. Available from:  
562 <https://www.ncbi.nlm.nih.gov/pmc/articles/PMC5253360/>
- 563 24. Barret M, Briand M, Bonneau S, Prévieux A, Valière S, Bouchez O, et al. Emergence Shapes  
564 the Structure of the Seed Microbiota. *Appl Environ Microbiol*. 2015 Feb 15;81(4):1257–66.
- 565 25. Yang L, Danzberger J, Schöler A, Schröder P, Schloter M, Radl V. Dominant Groups of  
566 Potentially Active Bacteria Shared by Barley Seeds become Less Abundant in Root Associated

- 567 Microbiome. *Front Plant Sci* [Internet]. 2017 Jun 15 [cited 2020 May 4];8. Available from:  
568 <https://www.ncbi.nlm.nih.gov/pmc/articles/PMC5471333/>
- 569 26. Torres-Cortés G, Bonneau S, Bouchez O, Genthon C, Briand M, Jacques M-A, et al. Functional  
570 Microbial Features Driving Community Assembly During Seed Germination and Emergence.  
571 *Front Plant Sci* [Internet]. 2018 [cited 2020 Jan 23];9. Available from:  
572 <https://www.frontiersin.org/articles/10.3389/fpls.2018.00902/full>
- 573 27. Rillig MC, Antonovics J, Caruso T, Lehmann A, Powell JR, Veresoglou SD, et al. Interchange of  
574 entire communities: microbial community coalescence. *Trends in Ecology & Evolution*. 2015  
575 Aug;30(8):470–6.
- 576 28. Rillig MC, Lehmann A, Aguilar-Trigueros CA, Antonovics J, Caruso T, Hempel S, et al. Soil  
577 microbes and community coalescence. *Pedobiologia*. 2016 Jan;59(1–2):37–40.
- 578 29. Rocca JD, Simonin M, Bernhardt ES, Washburne AD, Wright JP. Rare microbial taxa emerge  
579 when communities collide: freshwater and marine microbiome responses to experimental  
580 mixing. *Ecology*. 2020;101(3):e02956.
- 581 30. Castledine M, Sierocinski P, Padfield D, Buckling A. Community coalescence: an eco-  
582 evolutionary perspective. *Philosophical Transactions of the Royal Society B: Biological  
583 Sciences*. 2020 May 11;375(1798):20190252.
- 584 31. Shmida A, Wilson MV. Biological Determinants of Species Diversity. *Journal of Biogeography*.  
585 1985 Jan;12(1):1.
- 586 32. Fukami T. Historical Contingency in Community Assembly: Integrating Niches, Species Pools,  
587 and Priority Effects. *Annual Review of Ecology, Evolution, and Systematics*. 2015;46(1):1–23.

- 588 33. De Meester L, Vanoverbeke J, Kilsdonk LJ, Urban MC. Evolving Perspectives on  
589 Monopolization and Priority Effects. *Trends in Ecology & Evolution*. 2016 Feb 1;31(2):136–  
590 46.
- 591 34. Mallon CA, Poly F, Le Roux X, Marring I, van Elsas JD, Salles JF. Resource pulses can alleviate  
592 the biodiversity—invasion relationship in soil microbial communities. *Ecology*.  
593 2015;96(4):915–26.
- 594 35. Rochefort A, Briand M, Marais C, Wagner M-H, Laperche A, Vallée P, et al. Influence of  
595 Environment and Host Plant Genotype on the Structure and Diversity of the Brassica napus  
596 Seed Microbiota. *Phytobiomes Journal*. 2019 Jan 1;3(4):326–36.
- 597 36. Lachaise T, Ourry M, Lebreton L, Guillerm-Erckelboudt A-Y, Linglin J, Paty C, et al. Can soil  
598 microbial diversity influence plant metabolites and life history traits of a rhizophagous  
599 insect? A demonstration in oilseed rape. *Insect Science*. 2017;24(6):1045–56.
- 600 37. Buée M, Reich M, Murat C, Morin E, Nilsson RH, Uroz S, et al. 454 Pyrosequencing analyses  
601 of forest soils reveal an unexpectedly high fungal diversity. *New Phytologist*.  
602 2009;184(2):449–56.
- 603 38. Martin M. Cutadapt removes adapter sequences from high-throughput sequencing reads.  
604 *EMBnet.journal*. 2011 May 2;17(1):10–2.
- 605 39. Callahan BJ, McMurdie PJ, Rosen MJ, Han AW, Johnson AJA, Holmes SP. DADA2: High-  
606 resolution sample inference from Illumina amplicon data. *Nature Methods*. 2016  
607 Jul;13(7):581–3.

- 608 40. Wang Q, Garrity GM, Tiedje JM, Cole JR. Naïve Bayesian Classifier for Rapid Assignment of  
609 rRNA Sequences into the New Bacterial Taxonomy. *Appl Environ Microbiol*. 2007 Aug  
610 15;73(16):5261–7.
- 611 41. Abarenkov K, Nilsson RH, Larsson K-H, Alexander IJ, Eberhardt U, Erland S, et al. The UNITE  
612 database for molecular identification of fungi – recent updates and future perspectives. *New  
613 Phytologist*. 2010;186(2):281–5.
- 614 42. McMurdie PJ, Holmes S. phyloseq: An R Package for Reproducible Interactive Analysis and  
615 Graphics of Microbiome Census Data. *PLoS One* [Internet]. 2013 Apr 22 [cited 2019 Apr  
616 24];8(4). Available from: <https://www.ncbi.nlm.nih.gov/pmc/articles/PMC3632530/>
- 617 43. Wright E S. Using DECIPHER v2.0 to Analyze Big Biological Sequence Data in R. *The R Journal*.  
618 2016;8(1):352.
- 619 44. Schliep KP. phangorn: phylogenetic analysis in R. *Bioinformatics*. 2011 Feb 15;27(4):592–3.
- 620 45. Davis NM, Proctor DM, Holmes SP, Relman DA, Callahan BJ. Simple statistical identification  
621 and removal of contaminant sequences in marker-gene and metagenomics data.  
622 *Microbiome* [Internet]. 2018 Dec 17 [cited 2020 Apr 13];6. Available from:  
623 <https://www.ncbi.nlm.nih.gov/pmc/articles/PMC6298009/>
- 624 46. Fouquier J, Rideout JR, Bolyen E, Chase J, Shiffer A, McDonald D, et al. ghost-tree: creating  
625 hybrid-gene phylogenetic trees for diversity analyses. *Microbiome*. 2016 Feb 24;4(1):11.
- 626 47. Kembel SW, Cowan PD, Helmus MR, Cornwell WK, Morlon H, Ackerly DD, et al. Picante: R  
627 tools for integrating phylogenies and ecology. *Bioinformatics*. 2010 Jun 1;26(11):1463–4.

- 628 48. Oksanen J, Blanchet F, Kindt R, Legendre P, Minchin P, O'Hara R, et al. Vegan: community  
629 ecology package. R package version 2.4-2. 2017; Available from: [https://CRAN.R-](https://CRAN.R-project.org/package=vegan)  
630 [project.org/package=vegan](https://CRAN.R-project.org/package=vegan)
- 631 49. Anderson MJ. A new method for non-parametric multivariate analysis of variance. *Austral*  
632 *Ecology*. 2001;26(1):32–46.
- 633 50. Santoro AE. The do-it-all nitrifier. *Science*. 2016 Jan 22;351(6271):342–3.
- 634 51. Wang Z, Cao Y, Zhu-Barker X, Nicol GW, Wright AL, Jia Z, et al. Comammox Nitrospira clade B  
635 contributes to nitrification in soil. *Soil Biology and Biochemistry*. 2019 Aug 1;135:392–5.
- 636 52. Lex A, Gehlenborg N, Strobel H, Vuillemot R, Pfister H. UpSet: Visualization of Intersecting  
637 Sets. *IEEE Transactions on Visualization and Computer Graphics*. 2014 Dec;20(12):1983–92.
- 638 53. Morella NM, Weng FC-H, Joubert PM, Metcalf CJE, Lindow S, Koskella B. Successive  
639 passaging of a plant-associated microbiome reveals robust habitat and host genotype-  
640 dependent selection. *Proc Natl Acad Sci USA*. 2020 Jan 14;117(2):1148–59.
- 641 54. Martiny AC, Treseder K, Pusch G. Phylogenetic conservatism of functional traits in  
642 microorganisms. *ISME J*. 2013 Apr;7(4):830–8.
- 643 55. Leff JW, Lynch RC, Kane NC, Fierer N. Plant domestication and the assembly of bacterial and  
644 fungal communities associated with strains of the common sunflower, *Helianthus annuus*.  
645 *New Phytologist*. 2017;214(1):412–23.
- 646 56. Green SJ, Inbar E, Michel FC, Hadar Y, Minz D. Succession of Bacterial Communities during  
647 Early Plant Development: Transition from Seed to Root and Effect of Compost Amendment.  
648 *Appl Environ Microbiol*. 2006 Jun 1;72(6):3975–83.

- 649 57. Ofek M, Hadar Y, Minz D. Colonization of cucumber seeds by bacteria during germination.  
650 Environmental Microbiology. 2011;13(10):2794–807.
- 651 58. Normander B, Prosser JI. Bacterial Origin and Community Composition in the Barley  
652 Phytosphere as a Function of Habitat and Presowing Conditions. Appl Environ Microbiol.  
653 2000 Oct;66(10):4372–7.
- 654 59. Dombrowski N, Schlaeppli K, Agler MT, Hacquard S, Kemen E, Garrido-Oter R, et al. Root  
655 microbiota dynamics of perennial *Arabis alpina* are dependent on soil residence time but  
656 independent of flowering time. The ISME Journal. 2017 Jan;11(1):43–55.
- 657 60. Edwards JA, Santos-Medellín CM, Liechty ZS, Nguyen B, Lurie E, Eason S, et al. Compositional  
658 shifts in root-associated bacterial and archaeal microbiota track the plant life cycle in field-  
659 grown rice. PLOS Biology. 2018 Feb 23;16(2):e2003862.
- 660 61. Calderón K, Spor A, Breuil M-C, Bru D, Bizouard F, Violle C, et al. Effectiveness of ecological  
661 rescue for altered soil microbial communities and functions. The ISME Journal. 2017  
662 Jan;11(1):272–83.
- 663 62. Venterea RT, Rolston DE. Nitric and nitrous oxide emissions following fertilizer application to  
664 agricultural soil: Biotic and abiotic mechanisms and kinetics. J Geophys Res. 2000 Jun  
665 27;105(D12):15117–29.
- 666 63. Shade A, Jones SE, Caporaso JG, Handelsman J, Knight R, Fierer N, et al. Conditionally Rare  
667 Taxa Disproportionately Contribute to Temporal Changes in Microbial Diversity. mBio  
668 [Internet]. 2014 Aug 29 [cited 2020 May 25];5(4). Available from:  
669 <https://mbio.asm.org/content/5/4/e01371-14>



- 670 64. Ghezzi null, Steck null. Induction of the viable but non-culturable condition in *Xanthomonas*  
671 *campestris* pv. *campestris* in liquid microcosms and sterile soil. *FEMS Microbiol Ecol.* 1999  
672 Nov 1;30(3):203–8.
- 673 65. del Campo R, Russi P, Mara P, Mara H, Peyrou M, de León IP, et al. *Xanthomonas axonopodis*  
674 pv. *citri* enters the VBNC state after copper treatment and retains its virulence. *FEMS*  
675 *Microbiol Lett.* 2009 Sep;298(2):143–8.
- 676 66. Jiang N, Lv QY, Xu X, Cao YS, Walcott RR, Li JQ, et al. Induction of the viable but  
677 nonculturable state in *Clavibacter michiganensis* subsp. *michiganensis* and in planta  
678 resuscitation of the cells on tomato seedlings. *Plant Pathology.* 2016;65(5):826–36.
- 679 67. Nelson EB. Microbial dynamics and interactions in the spermosphere. *Annu Rev Phytopathol.*  
680 2004 Sep;42(1):271–309.
- 681 68. Pinto D, Santos MA, Chambel L. Thirty years of viable but nonculturable state research:  
682 Unsolved molecular mechanisms. *Critical Reviews in Microbiology.* 2015 Jan 2;41(1):61–76.
- 683 69. Wu X, Li J, Ji M, Wu Q, Wu X, Ma Y, et al. Non-synchronous Structural and Functional  
684 Dynamics During the Coalescence of Two Distinct Soil Bacterial Communities. *Front*  
685 *Microbiol* [Internet]. 2019 [cited 2020 Oct 21];10. Available from:  
686 <https://www.frontiersin.org/articles/10.3389/fmicb.2019.01125/full>
- 687 70. Ramoneda J, Roux JL, Stadelmann S, Frossard E, Frey B, Gamper HA. Coalescence of rhizobial  
688 communities in soil interacts with fertilization and determines the assembly of rhizobia in  
689 root nodules. *bioRxiv.* 2020 Jan 17;2020.01.16.908863.

690 71. Jousset A, Bienhold C, Chatzinotas A, Gallien L, Gobet A, Kurm V, et al. Where less may be

691 more: how the rare biosphere pulls ecosystems strings. *The ISME Journal*. 2017

692 Apr;11(4):853–62.

693

694 **Figure legend**

695 **Figure 1** Diversity of initial seed and soil microbial community pools before coalescence. (A)  
696 Bacterial alpha-diversity. (B) Fungal alpha-diversity. (C) Microbial dispersion to centroid. (D)  
697 Microbial beta-diversity. Bacterial and fungal richness were estimated with Chao1. Bacterial  
698 and fungal phylogenetic diversities were calculated with Faith's phylogenetic diversity (PD).  
699 PCoA ordination of Bray-Curtis index was calculated for bacteria and fungi. Seed microbiota  
700 (blue) was described in two *B. napus* genotypes (Boston, Major) harvested during two  
701 consecutive years (Y1, Y2). Soil microbiota (green) was described in two soils originating  
702 from dilution-extinction serials (High-, Low-diversity).

703 **Figure 2** Structure of seedling microbiota after coalescence with contrasted seed and soil  
704 microbiota. (A, B) Bacterial alpha-diversity. (C, D) Fungal alpha diversity. (E, F, I, J) Bacterial  
705 beta-diversity in stems and roots. (G, H, K, L) Fungal beta-diversity in stems and roots. Open  
706 and closed dots are *B. napus* genotypes. Dots are colored either by harvest year (A-H) or by  
707 soil diversity (I-L). Bacterial and fungal richness were estimated with Chao1. Bacterial and  
708 fungal phylogenetic diversities were calculated with Faith's phylogenetic diversity. PCoA  
709 ordination of Bray-Curtis index was calculated for bacteria and fungi.

710 **Figure 3** Origin of microbial taxa within stem and root assemblages. Bacterial (A) and fungal  
711 (B) ASVs shared between seeds, soil, roots and stems at each harvesting stage (d07 or d14)  
712 and soil diversity (High or Low). For each plot, upper-right bar charts summarize the  
713 proportion and relative abundance of plant-associated ASVs that were detected in soil  
714 and/or seeds or not detected (unknown) within these habitats.

715 **Figure 4** Taxonomic profiles of microbial communities associated with initial *B. napus* seeds  
716 and soil and with seedlings at 7 or 14 days after sowing. The 15 most abundant bacterial (A)  
717 and fungal (B) orders detected in seeds, soils, roots and stems are displayed.

718 **Figure 5** Influence of the initial bacterial (A) and fungal (B) diversity of the colonizing pools  
719 (seed or soil) on the transmission success to the seedling at d14. Nature of the initial pool  
720 (seed (Genotype/Year) or soil diversity (High-, Low- diversity)) is mentioned and separated  
721 with dashed lines. Colors represent the receiving seedling compartment (root or stem).

722 **Figure 6** Relationship between relative abundance of transmitted bacterial (A-D) and fungal  
723 (E-H) ASVs in the source (seed or soil) and in seedling roots and stems. Each dot represents  
724 one ASV and is colored according to its relative abundance in the source (seed or soil).

725

726

727

# Seed microbiota

# Soil microbiota

**A**

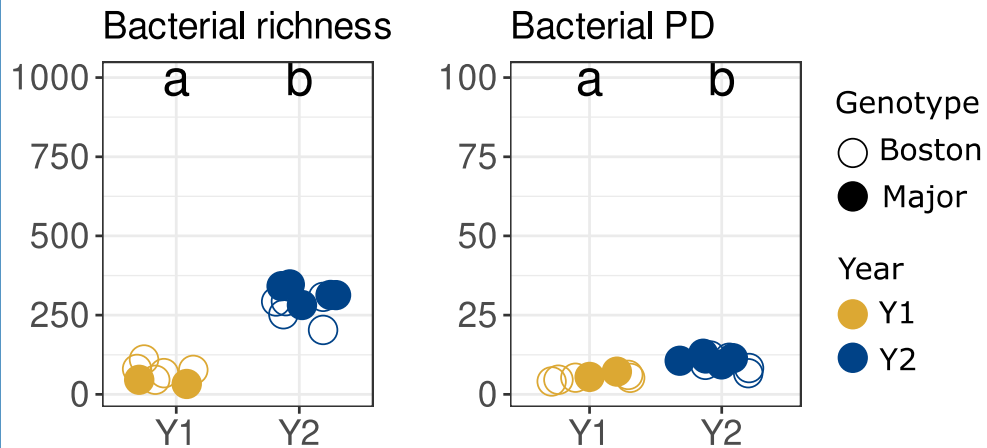

**B**

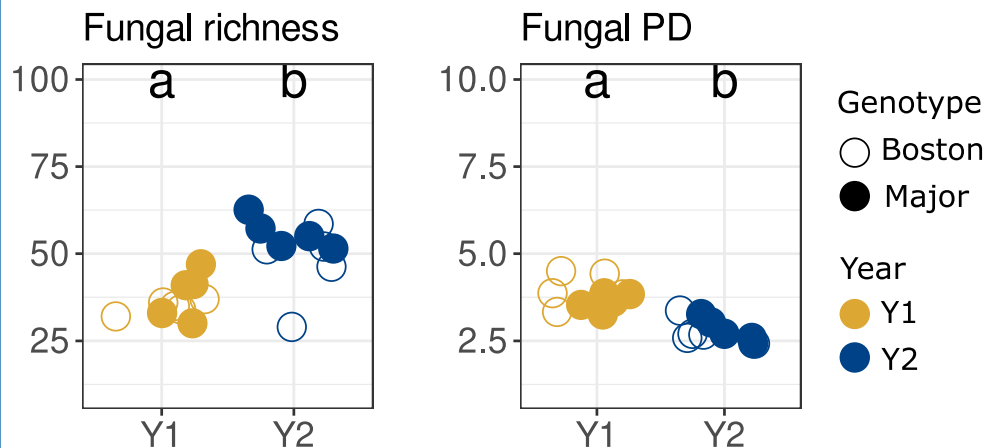

**C**

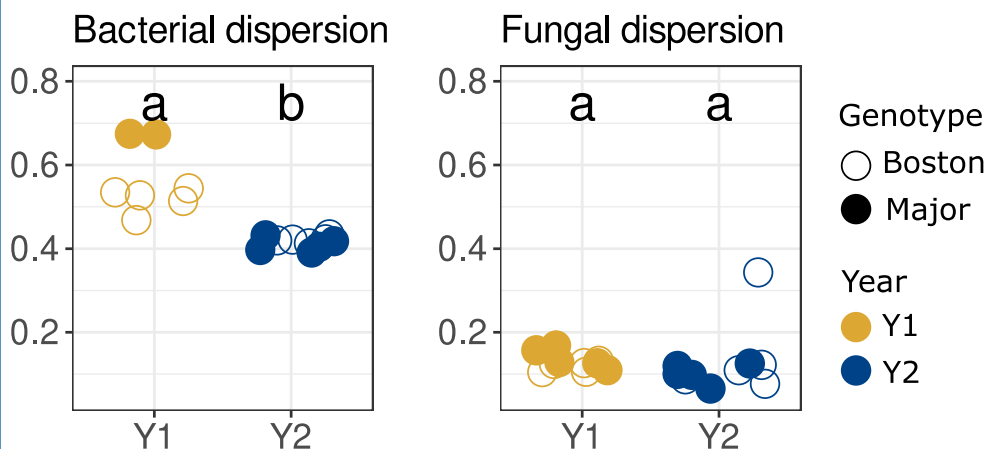

**D**

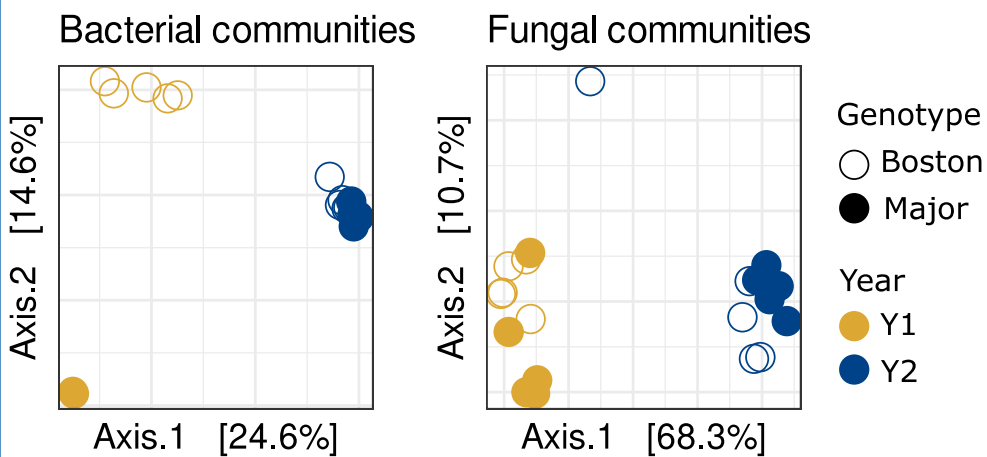

**A**

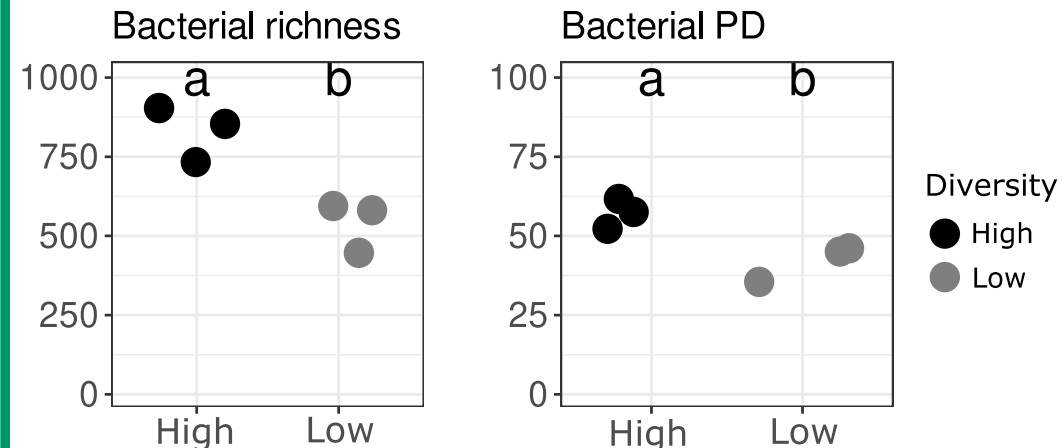

**B**

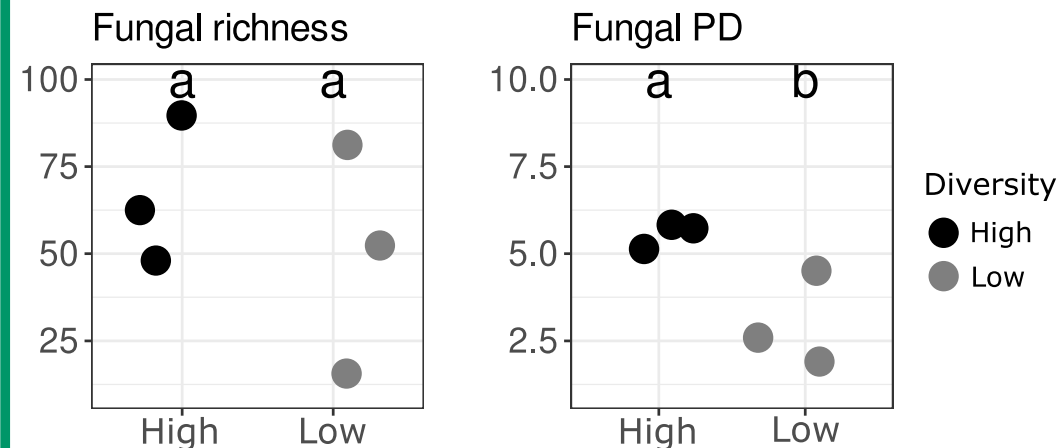

**C**

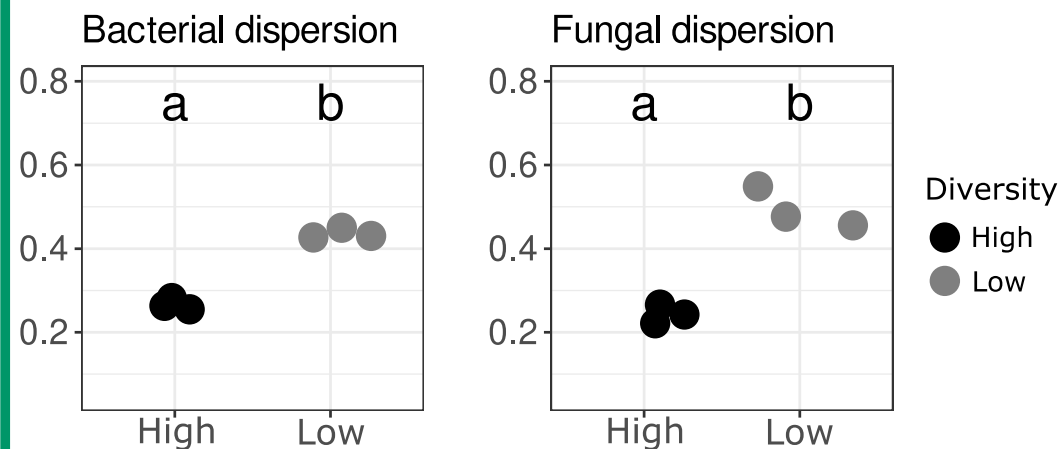

**D**

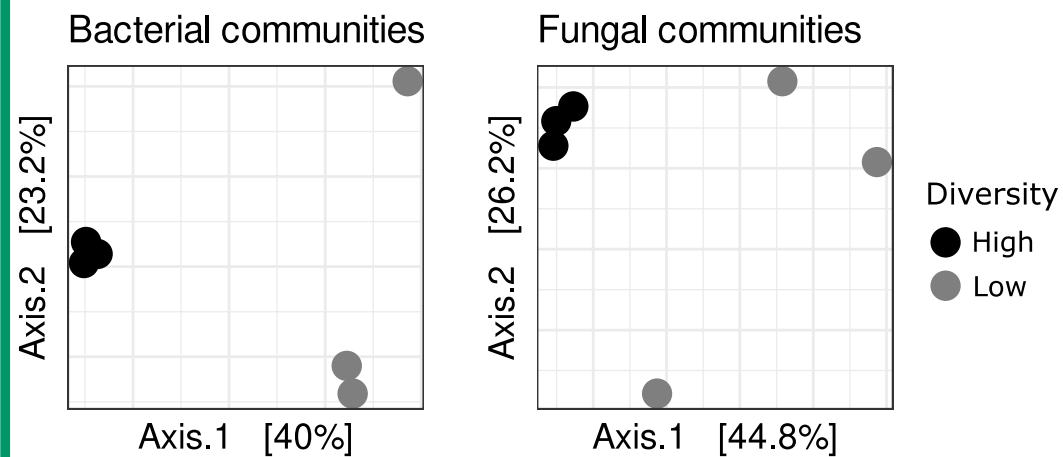

**A - Estimate bacterial richness**

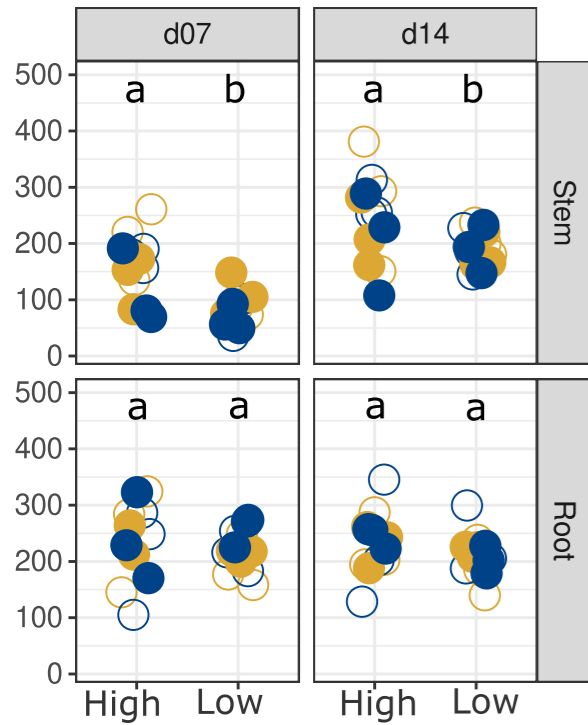

**B - Bacterial phylogenetic diversity**

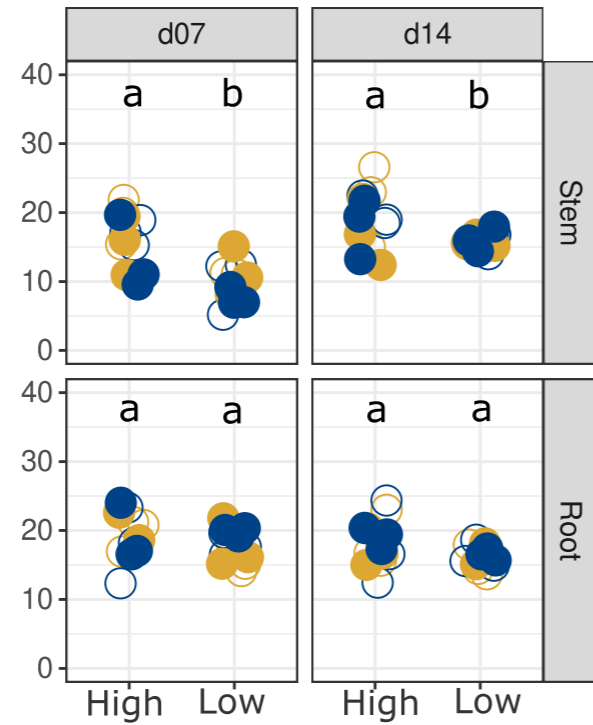

**C - Estimate fungal richness**

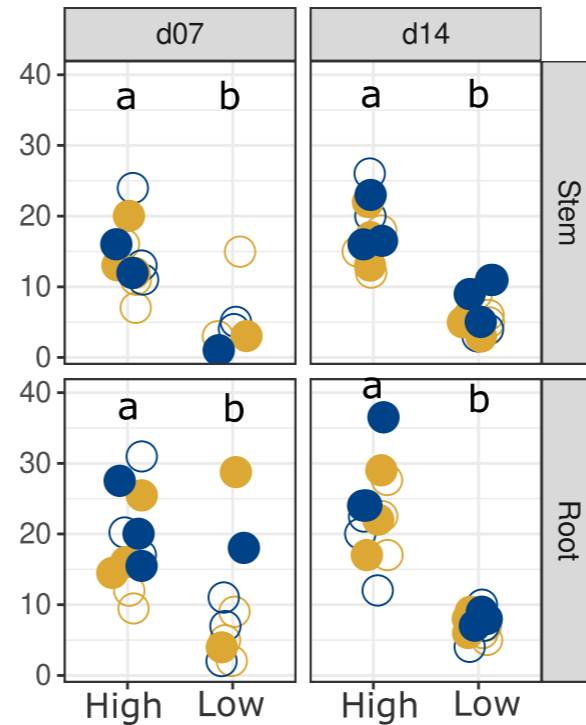

**D - Fungal phylogenetic diversity**

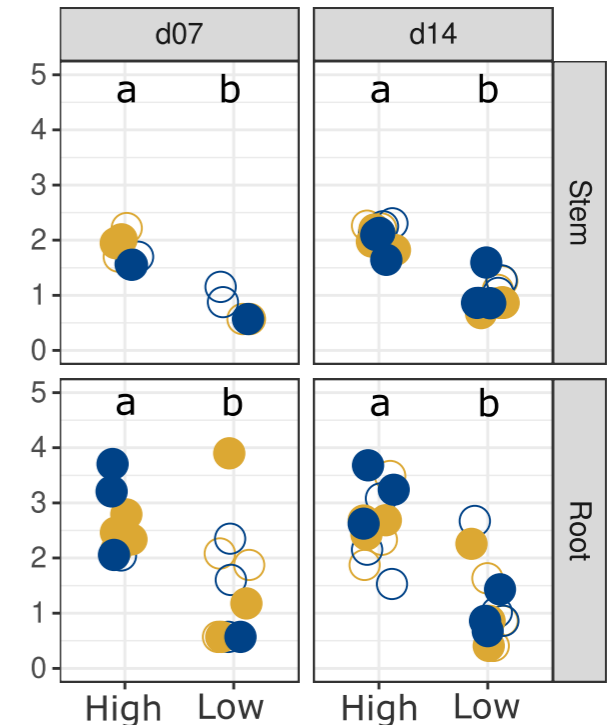

Genotype  
○ Boston  
● Major

Year  
● Y1  
● Y2

**E - Stem bacterial composition**

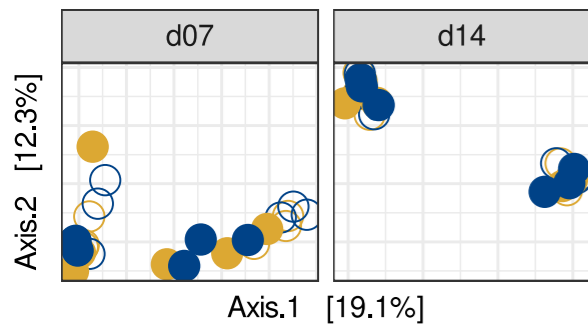

**F - Root bacterial composition**

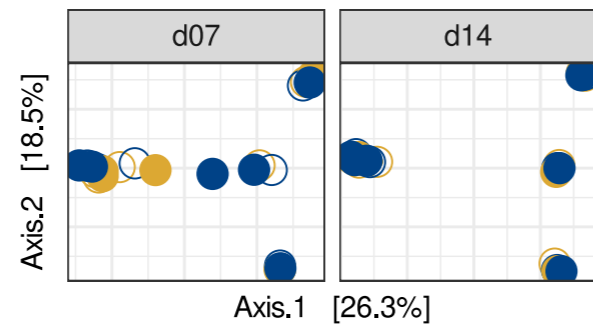

**G - Stem fungal composition**

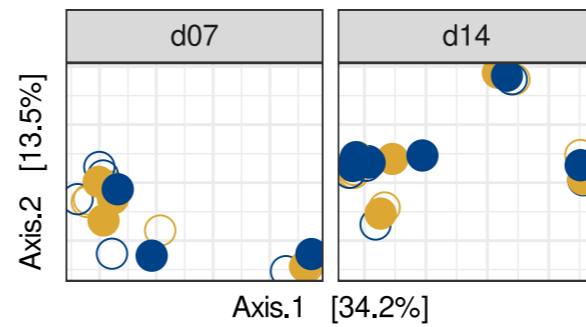

**H - Root fungal composition**

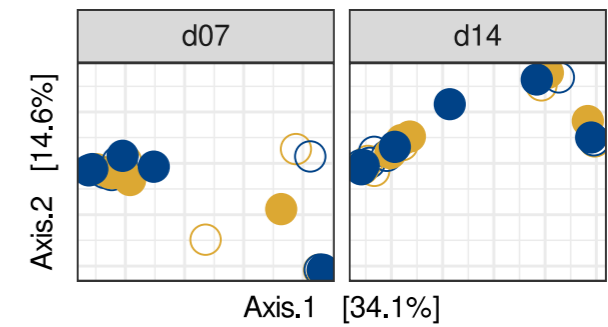

Genotype  
○ Boston  
● Major

Year  
● Y1  
● Y2

**I - Stem bacterial composition**

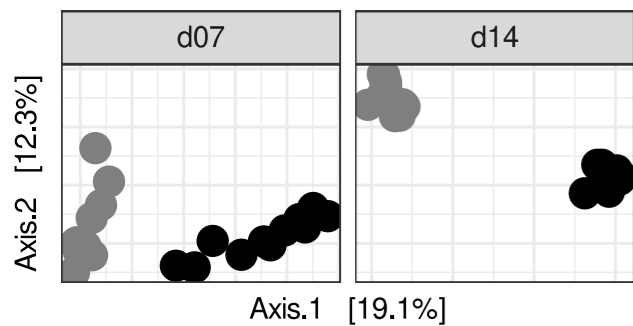

**J - Root bacterial composition**

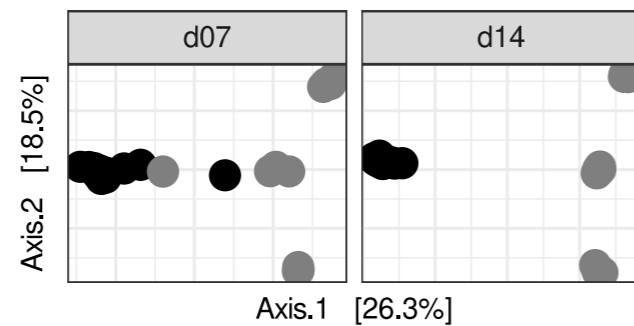

**K - Stem fungal composition**

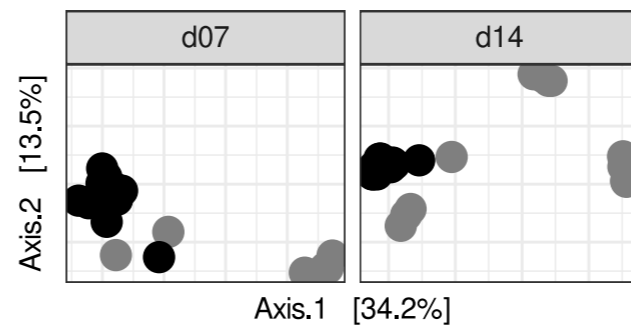

**L - Root fungal composition**

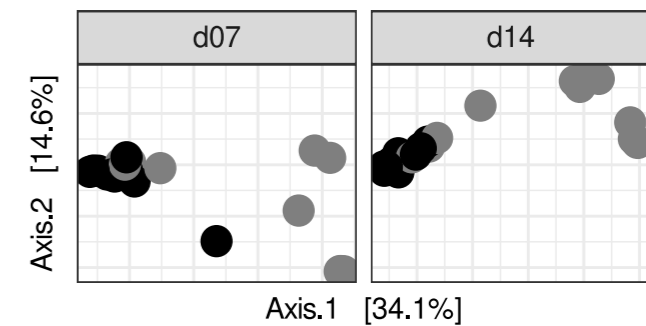

Soil diversity  
● High  
● Low

**A**

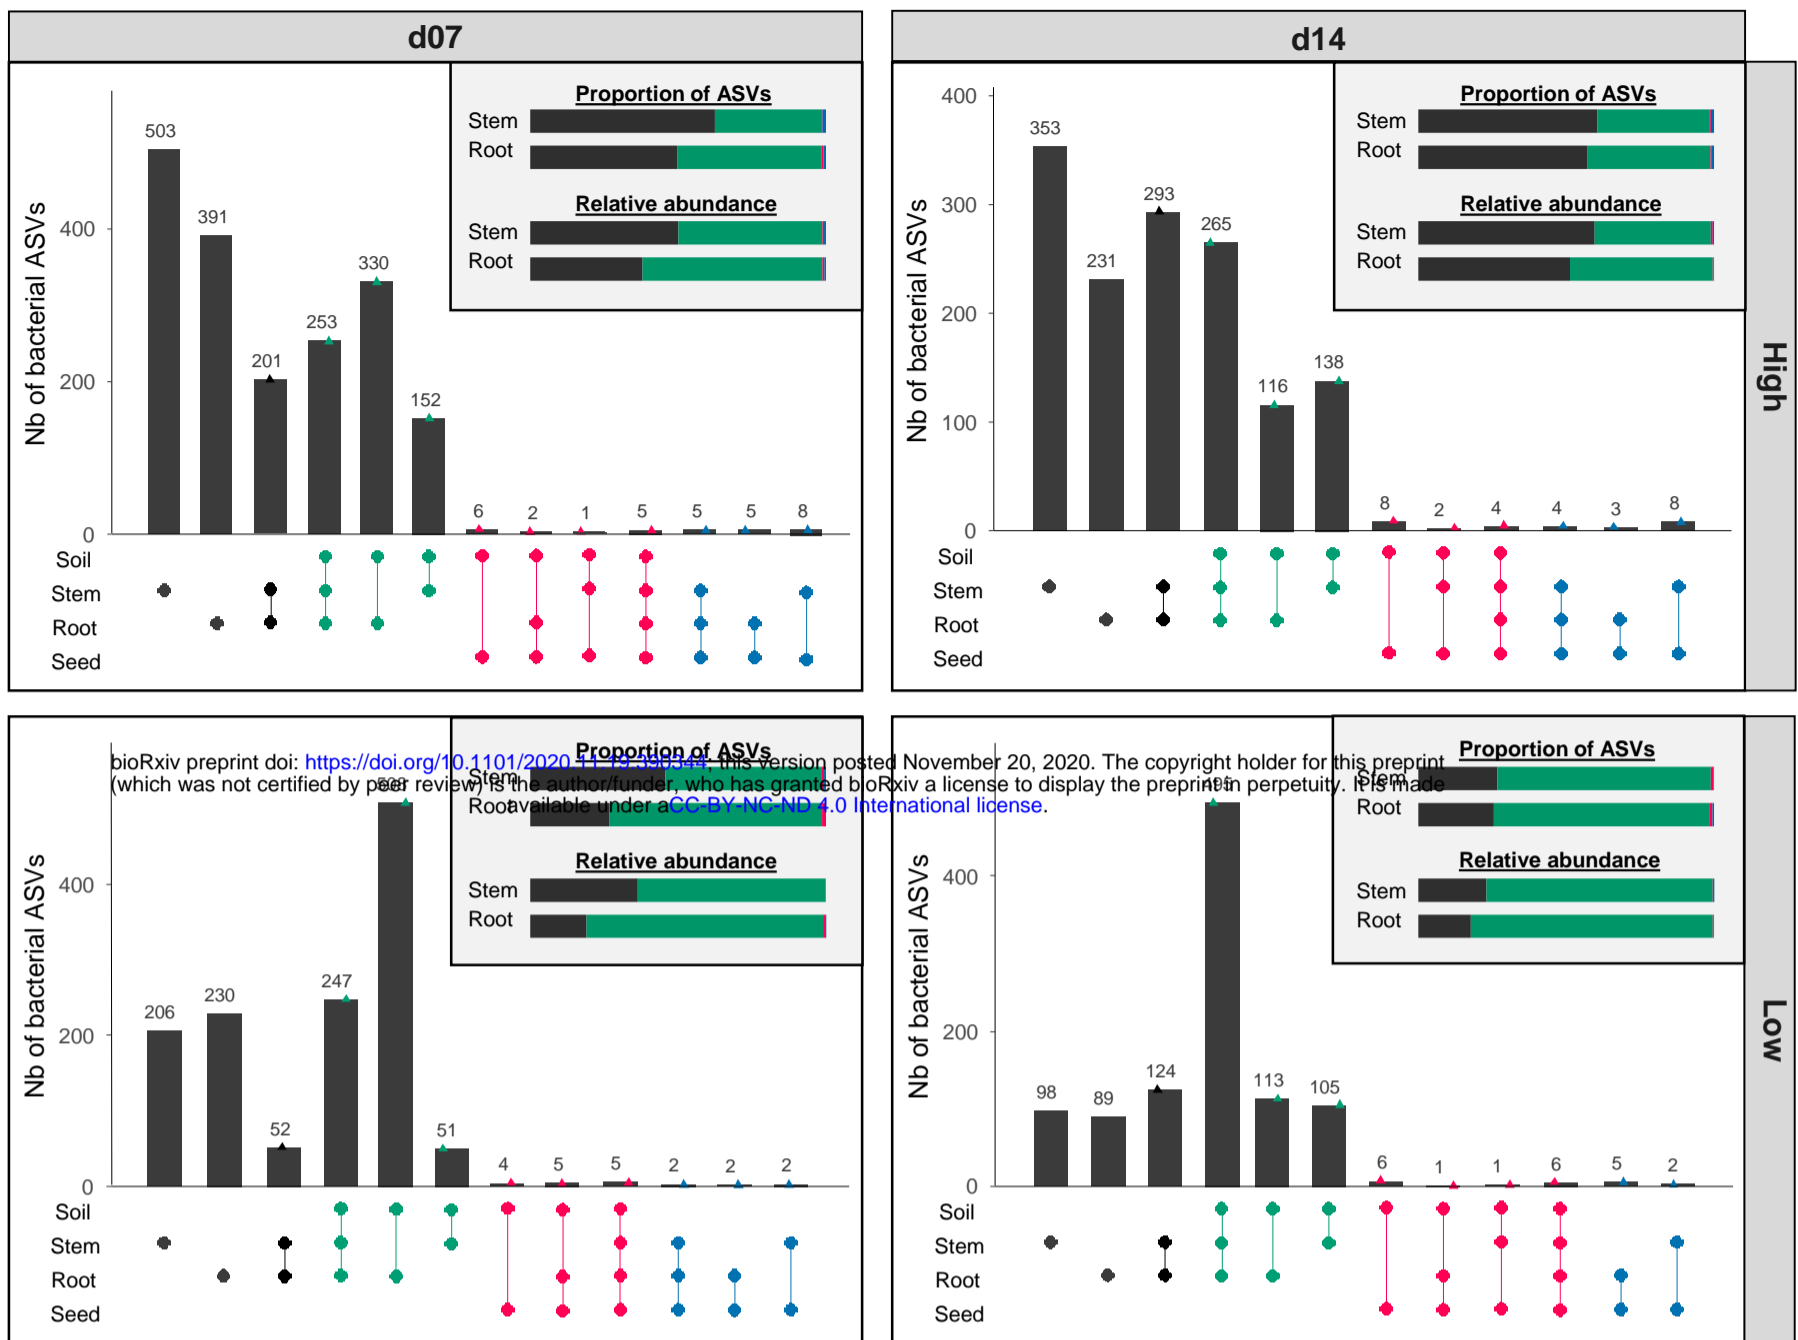

**B**

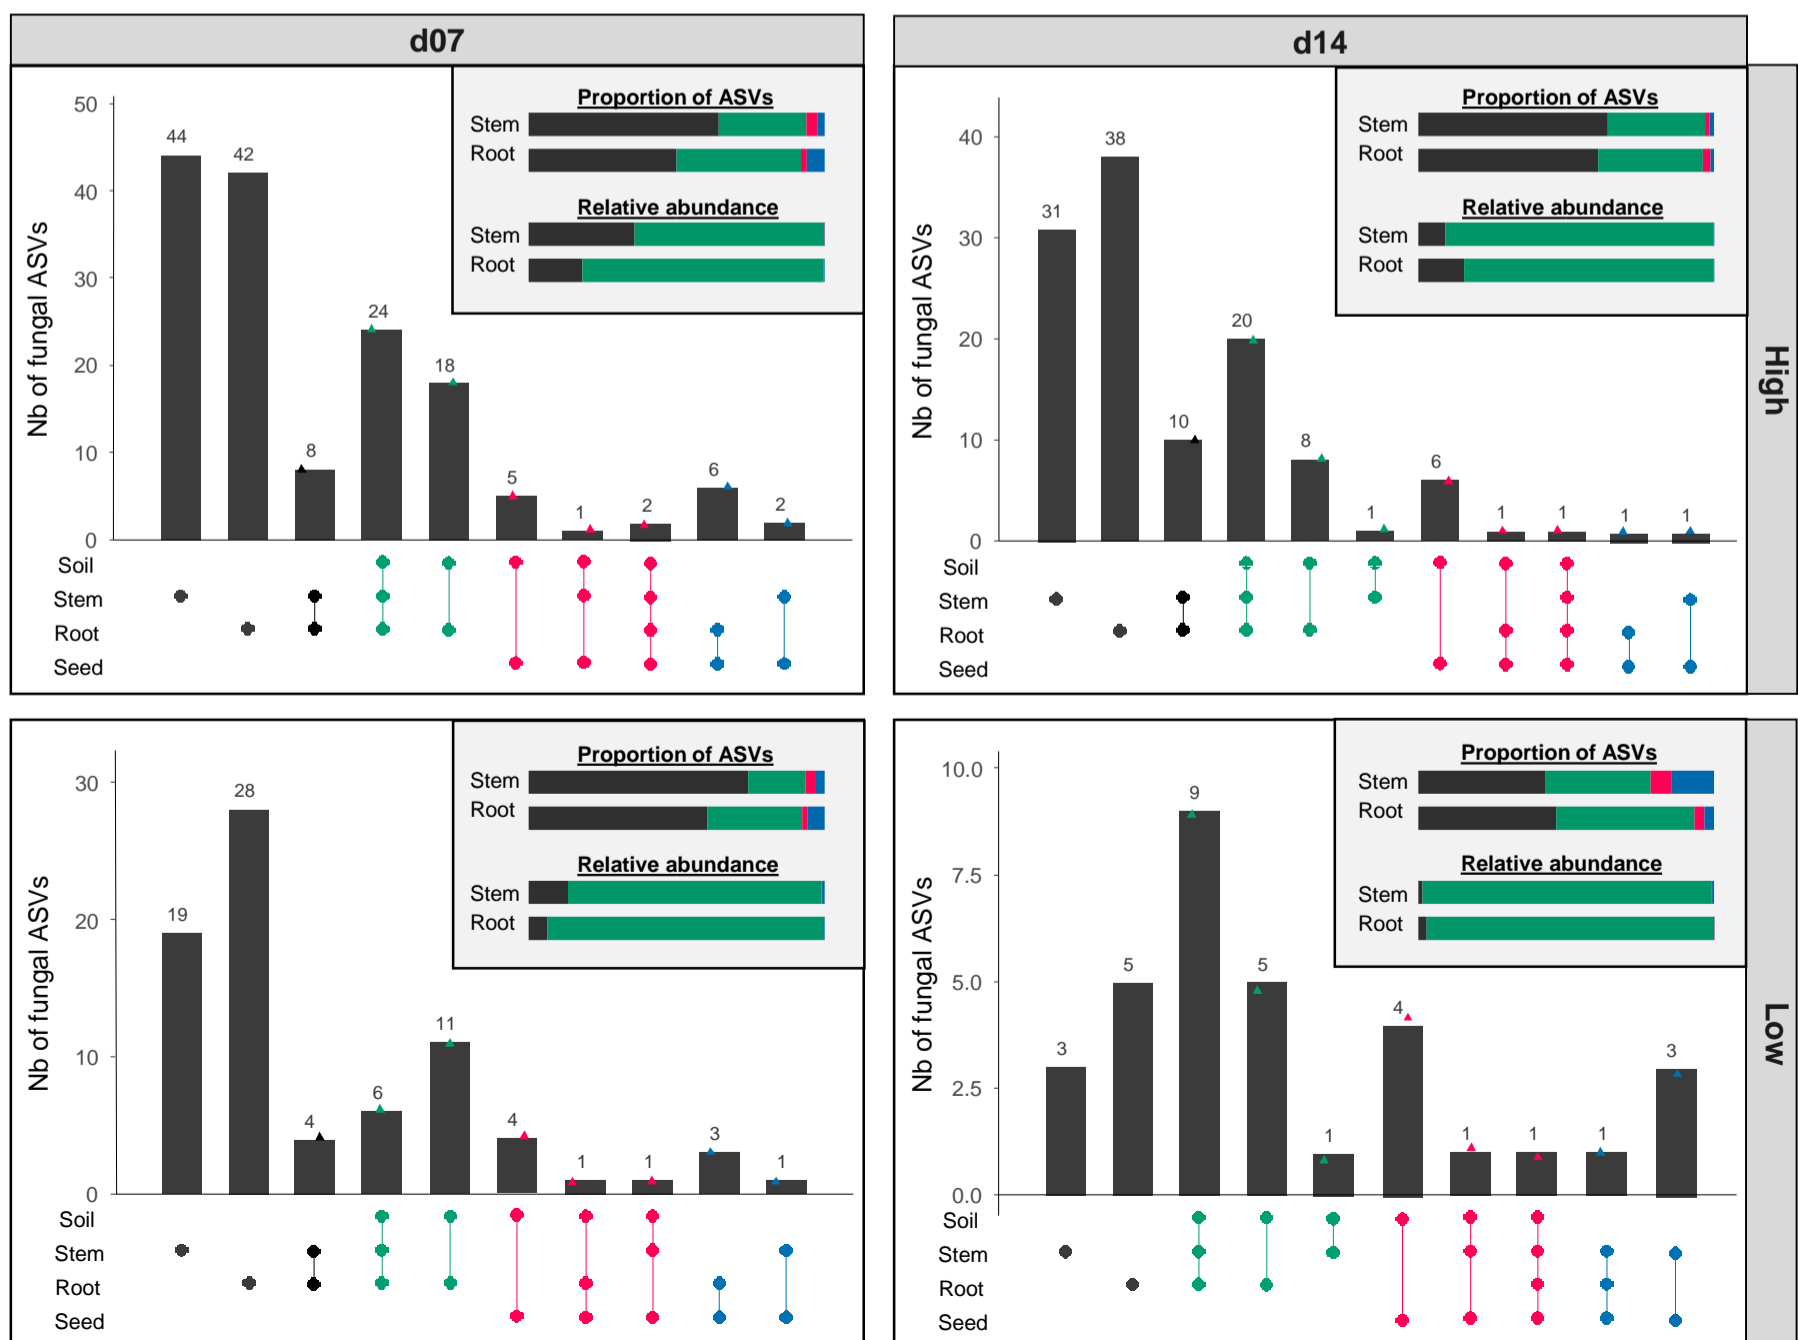

**A.**

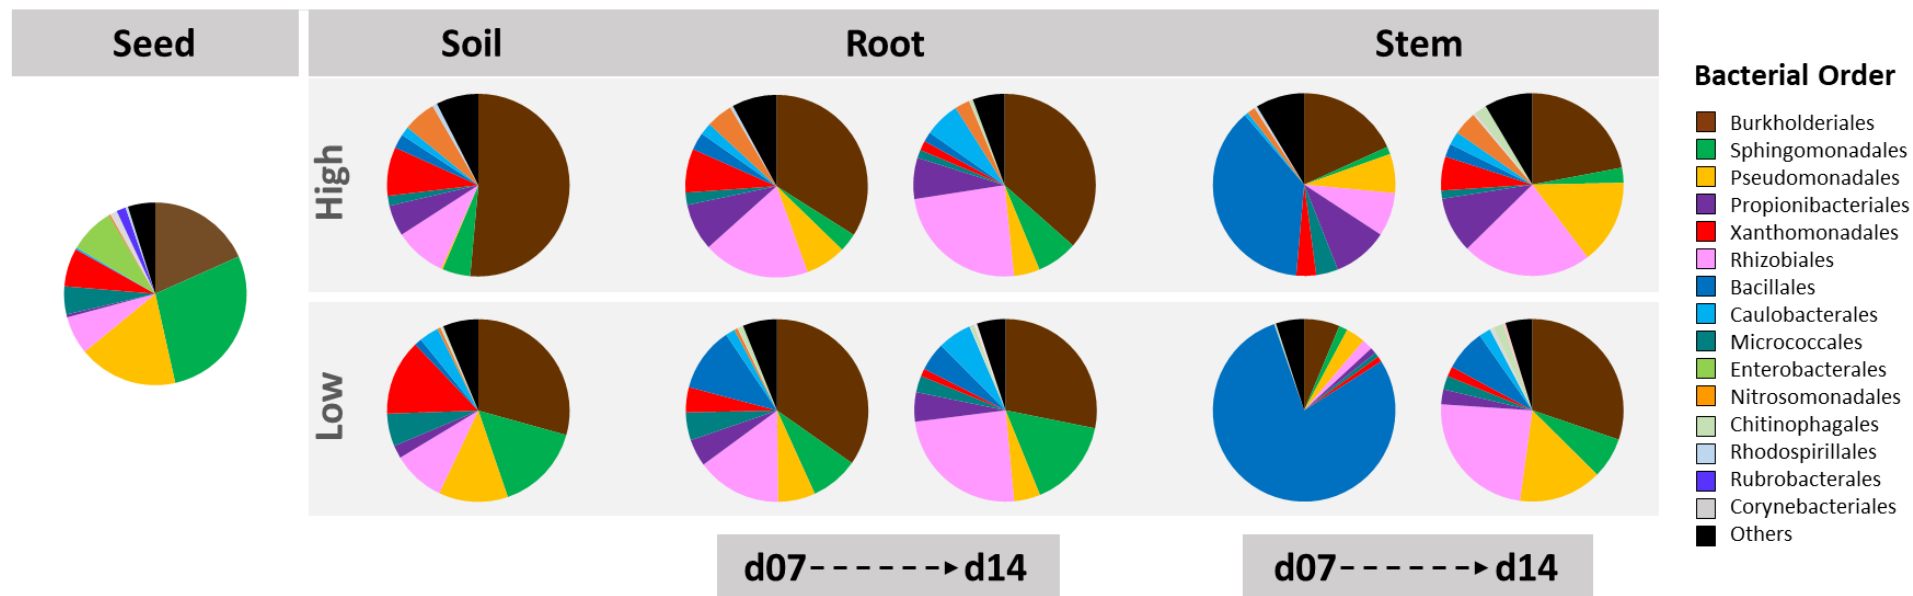

**B.**

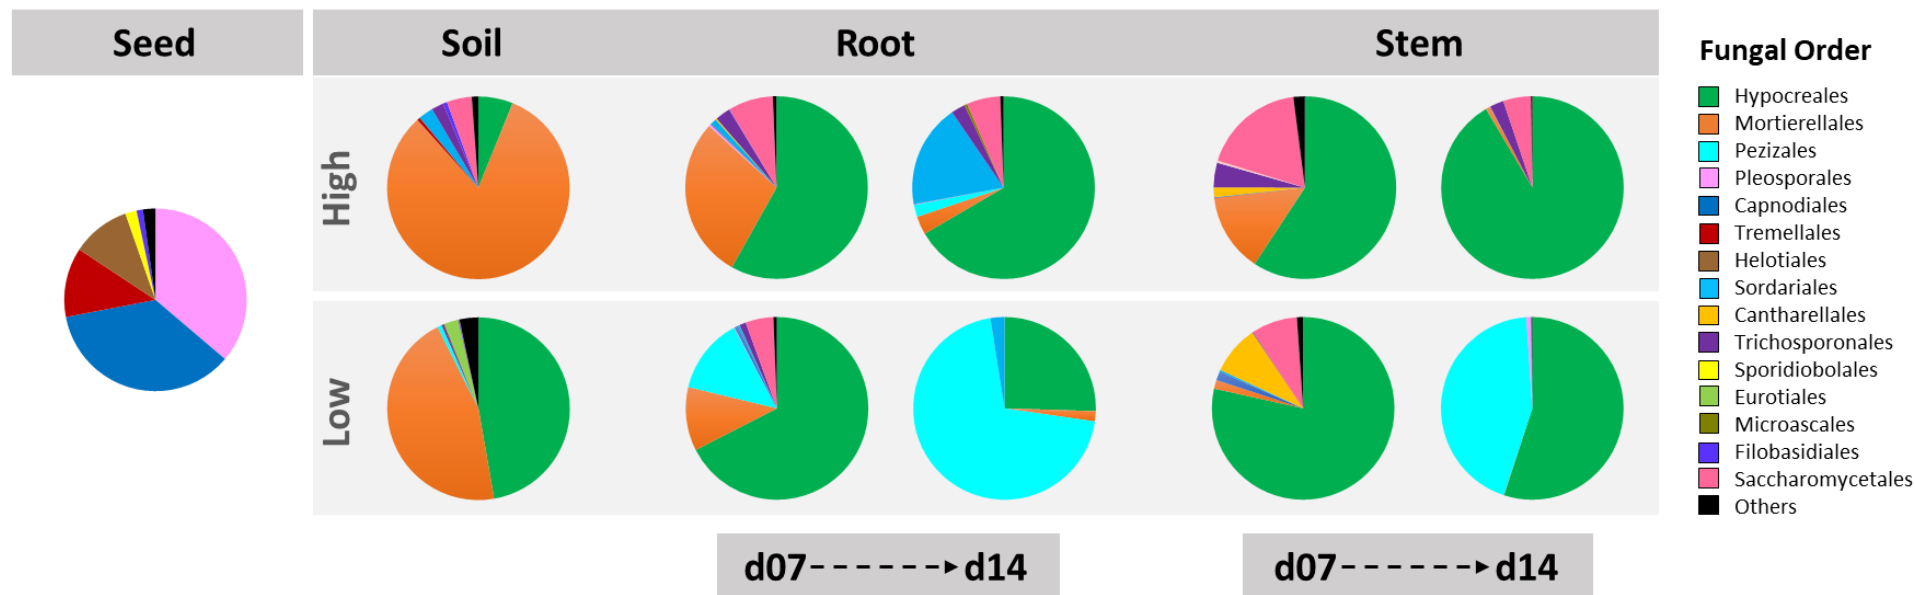



**A – Bacteria**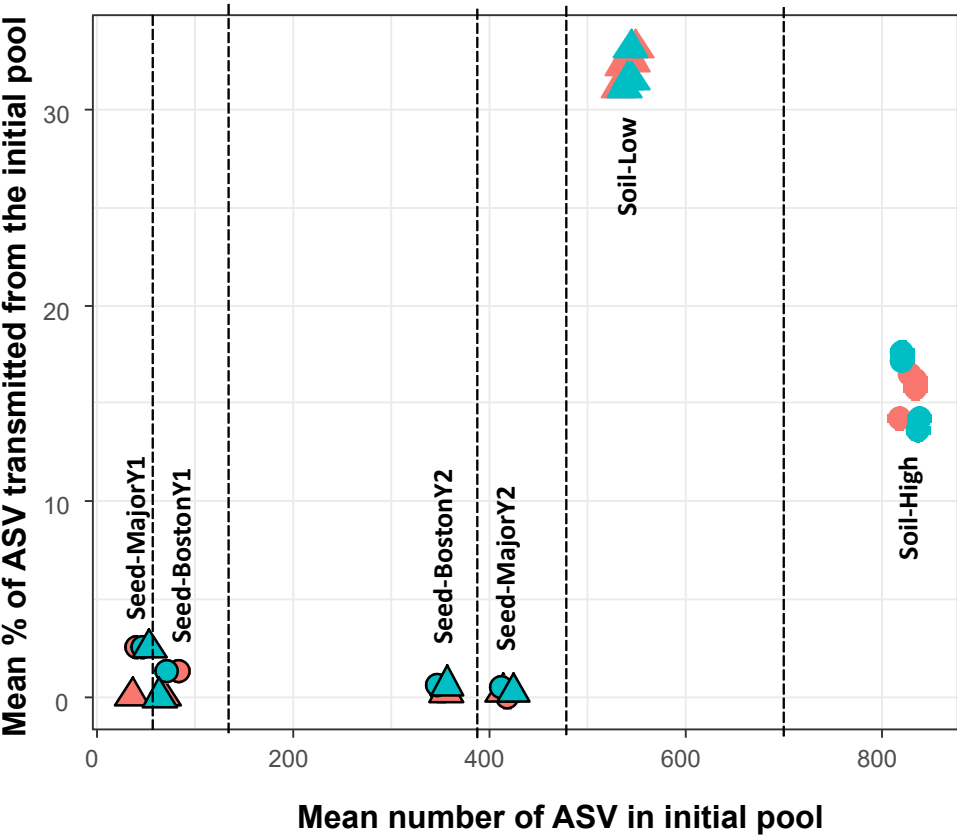**B – Fungi**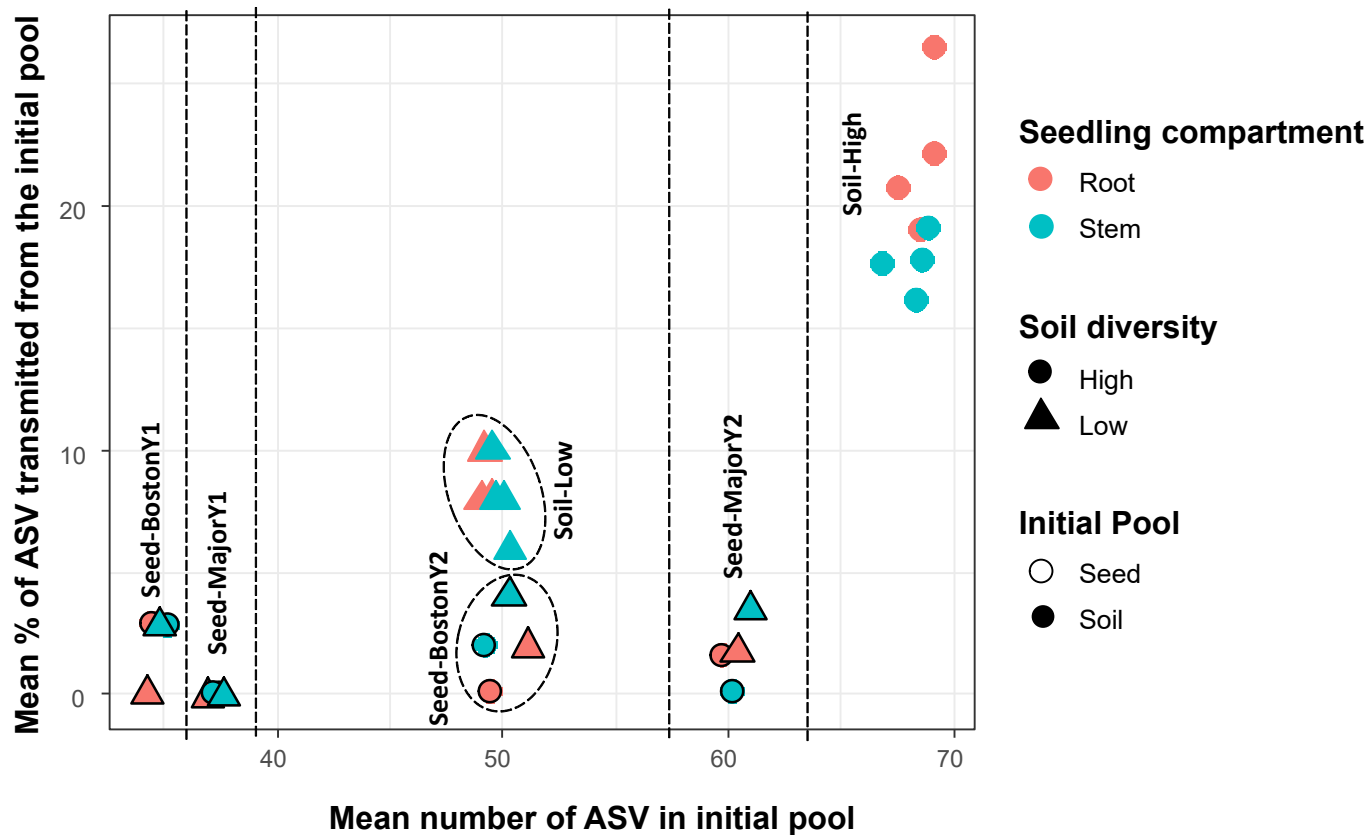

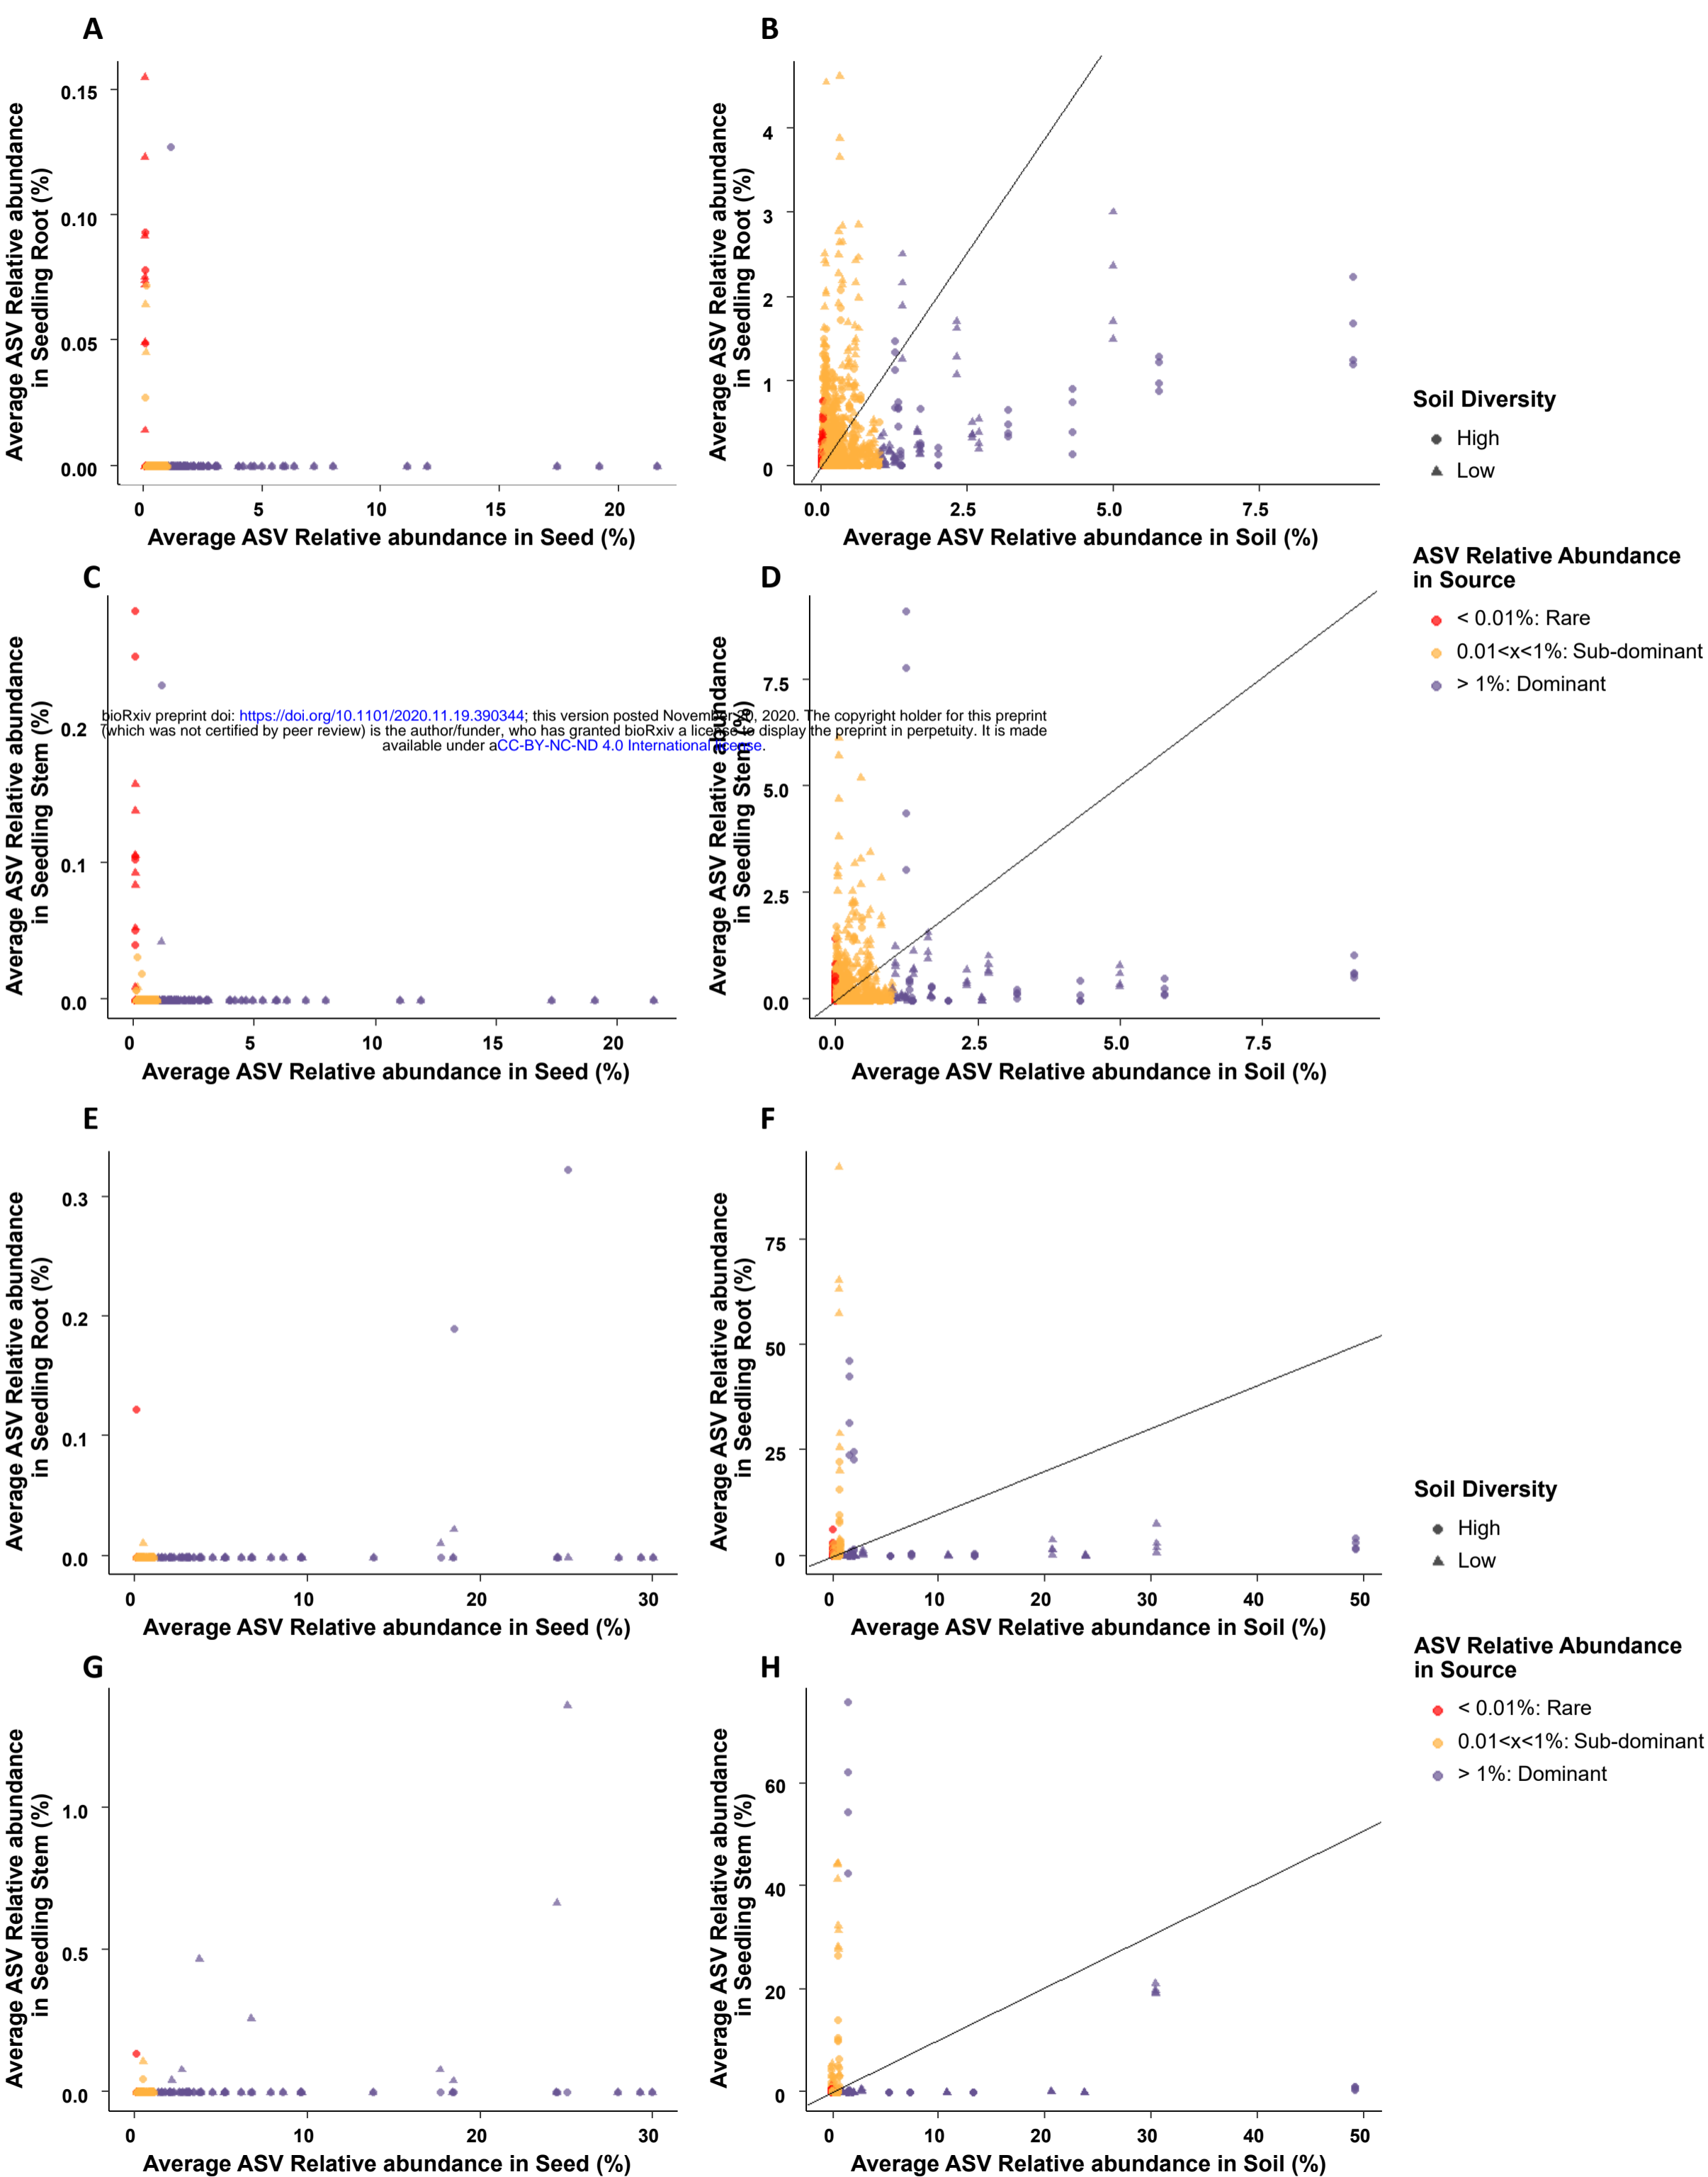

**Table 1: Soil physicochemical analyses and relative abundance of bacterial nitrifiers.** Values for high and low soil microbial diversities are the average of the 3 replicates  $\pm$  standard errors. T-test was performed on data, and significant p-values are indicated with an asterisk. AOB = Ammonia-oxidizing

| Soil diversity | pH                 | Organic carbone (C) g/kg | Total nitrogen (N) g/kg | Organic material g/kg | C/N ratio          | Total calcium carbonate (CaCO <sub>3</sub> ) g/kg | Nitric nitrogen (N of NO <sub>3</sub> ) on extract 1/10 mg/kg | Ammoniacal nitrogen (N of NH <sub>4</sub> ) on extract 1/10 mg/kg | AOB (%)           | NOB (%)            |
|----------------|--------------------|--------------------------|-------------------------|-----------------------|--------------------|---------------------------------------------------|---------------------------------------------------------------|-------------------------------------------------------------------|-------------------|--------------------|
| <b>High</b>    | 6.24<br>$\pm$ 0.03 | 7.30<br>$\pm$ 0.32       | 0.84<br>$\pm$ 0.04      | 12.6<br>$\pm$ 0.56    | 8.65<br>$\pm$ 0.20 | <1                                                | 72.2<br>$\pm$ 0.44                                            | 1.96<br>$\pm$ 0.42                                                | 5.7<br>$\pm$ 2.7  | 0.25<br>$\pm$ 0.03 |
| <b>Low</b>     | 6.89<br>$\pm$ 0.09 | 7.26<br>$\pm$ 0.17       | 0.84<br>$\pm$ 0.02      | 12.6<br>$\pm$ 0.31    | 8.61<br>$\pm$ 0.05 | <1                                                | 29.03<br>$\pm$ 1.68                                           | 32.57<br>$\pm$ 0.93                                               | 0.5<br>$\pm$ 0.11 | 0                  |
| <b>T-test</b>  | 0.003*             | 0.87                     | 1                       | 0.93                  | 0.73               | 1                                                 | 0.0002 *                                                      | 2.97.10 <sup>-5</sup> *                                           | 0.08*             | 0.005*             |

bacteria. NOB = Nitrite-oxidizing bacteria.

**Table 2: Permutational multivariate analysis of variance on seedling roots and stems microbial beta-diversity.** Linear model was built with the adonis2 function on data separated by root or stem compartment, integrating soil diversity (high and low), sampling stages (d07 and d14), GxY (interaction between plant genotype and year), and interaction between soil and GxY Significant values and their associated percentage of variance

|             |          | <b>Bacteria</b> |                         | <b>Fungi</b>   |                         |
|-------------|----------|-----------------|-------------------------|----------------|-------------------------|
|             |          | P-value         | % of explained variance | P-value        | % of explained variance |
| <b>Root</b> | Soil     | <b>0.001 *</b>  | <b>36.8</b>             | <b>0.001 *</b> | <b>22.1</b>             |
|             | Stage    | <b>0.001 *</b>  | <b>10.2</b>             | <b>0.003 *</b> | <b>8.0</b>              |
|             | GxY      | 0.955           | -                       | 0.999          | -                       |
|             | Soil:GxY | 0.990           | -                       | 0.996          | -                       |
| <b>Stem</b> | Soil     | <b>0.001 *</b>  | <b>14.6</b>             | <b>0.001 *</b> | <b>24.1</b>             |
|             | Stage    | <b>0.001 *</b>  | <b>46.5</b>             | <b>0.002 *</b> | <b>8.6</b>              |
|             | GxY      | 0.394           | -                       | 0.986          | -                       |
|             | Soil:GxY | 0.695           | -                       | 0.878          | -                       |

(R<sup>2</sup>) are in bold and followed by an asterisk ( $p < 0.05$ ).
